# Supplementary material for: The Carcinogenic Liver Fluke, Clonorchis sinensis: New Assembly, Reannotation and Analysis of the Genome and Characterization of Tissue Transcriptomes
Source: PLoS One. 2013 Jan 30;8(1):e54732. doi: 10.1371/journal.pone.0054732 (PMC3559784; doi:10.1371/journal.pone.0054732)
Supplement: Table S3 — Main features of the RNA-Seq data from four C. sinensis tissues. (XLS) [file pone.0054732.s008.xls]

## Sheet: Table S3
Table S3. Main features of RNA-Seq data of four tissues from C. sinensis.
Organ		Raw data			Clean data
	Insert Size (bp)	Reads length (bp)	Reads pairs (million)	Total length (Gb)	Average reads length (bp)	Reads pairs (million)	Total length (Gb)
ovary	280	121	14.24	3.45	110	11.92	2.62
testis	280	121	51.38	12.43	110	43.14	9.49
sucker	280	121	38.32	9.27	110	32.43	7.1
muscle	380	121	13.38	3.24	109	11.2	2.44
Total		121	117.32	28.39	110	98.69	21.66
