# Supplementary material for: The Carcinogenic Liver Fluke, Clonorchis sinensis: New Assembly, Reannotation and Analysis of the Genome and Characterization of Tissue Transcriptomes
Source: PLoS One. 2013 Jan 30;8(1):e54732. doi: 10.1371/journal.pone.0054732 (PMC3559784; doi:10.1371/journal.pone.0054732)
Supplement: Table S13 — Gene ontology of putative genes encoding excretory-secretory products. (XLS) [file pone.0054732.s018.xls]

## Sheet: Table S13
Table S13. Gene ontology of putative genes encoding excretory-secretory products.
Gene ID	Gene Annotation	GO ID	GO class	GO description
csin100192	hypothetical LOC582986	GO:0003824	molecular_function	catalytic activity
csin100192	hypothetical LOC582986	GO:0016740	molecular_function	transferase activity
csin100192	hypothetical LOC582986	GO:0005488	molecular_function	binding
csin100192	hypothetical LOC582986	GO:0003676	molecular_function	nucleic acid binding
csin100192	hypothetical LOC582986	GO:0008152	biological_process	metabolic process
csin100192	hypothetical LOC582986	GO:0006807	biological_process	nitrogen compound metabolic process
csin100192	hypothetical LOC582986	GO:0009058	biological_process	biosynthetic process
csin100192	hypothetical LOC582986	GO:0043170	biological_process	macromolecule metabolic process
csin100192	hypothetical LOC582986	GO:0044237	biological_process	cellular metabolic process
csin100192	hypothetical LOC582986	GO:0044238	biological_process	primary metabolic process
csin100192	hypothetical LOC582986	GO:0009987	biological_process	cellular process
csin100356	Cbr-tag-196; C. briggsae CBR-TAG-196 protein; K01373 cathepsin F [EC:3.4.22.	GO:0003824	molecular_function	catalytic activity
csin100356	Cbr-tag-196; C. briggsae CBR-TAG-196 protein; K01373 cathepsin F [EC:3.4.22.	GO:0016787	molecular_function	hydrolase activity
csin100356	Cbr-tag-196; C. briggsae CBR-TAG-196 protein; K01373 cathepsin F [EC:3.4.22.	GO:0030234	molecular_function	enzyme regulator activity
csin100356	Cbr-tag-196; C. briggsae CBR-TAG-196 protein; K01373 cathepsin F [EC:3.4.22.	GO:0004857	molecular_function	enzyme inhibitor activity
csin100356	Cbr-tag-196; C. briggsae CBR-TAG-196 protein; K01373 cathepsin F [EC:3.4.22.	GO:0061134	molecular_function	peptidase regulator activity
csin100356	Cbr-tag-196; C. briggsae CBR-TAG-196 protein; K01373 cathepsin F [EC:3.4.22.	GO:0008152	biological_process	metabolic process
csin100356	Cbr-tag-196; C. briggsae CBR-TAG-196 protein; K01373 cathepsin F [EC:3.4.22.	GO:0043170	biological_process	macromolecule metabolic process
csin100356	Cbr-tag-196; C. briggsae CBR-TAG-196 protein; K01373 cathepsin F [EC:3.4.22.	GO:0044238	biological_process	primary metabolic process
csin100432	hypothetical protein	GO:0003824	molecular_function	catalytic activity
csin100432	hypothetical protein	GO:0016740	molecular_function	transferase activity
csin100432	hypothetical protein	GO:0008152	biological_process	metabolic process
csin100432	hypothetical protein	GO:0009058	biological_process	biosynthetic process
csin100432	hypothetical protein	GO:0043170	biological_process	macromolecule metabolic process
csin100432	hypothetical protein	GO:0044237	biological_process	cellular metabolic process
csin100432	hypothetical protein	GO:0044238	biological_process	primary metabolic process
csin100432	hypothetical protein	GO:0009987	biological_process	cellular process
csin100522	ADP-ribosylation factor-like protein 8B-A	GO:0005488	molecular_function	binding
csin100522	ADP-ribosylation factor-like protein 8B-A	GO:0000166	molecular_function	nucleotide binding
csin100522	ADP-ribosylation factor-like protein 8B-A	GO:0009987	biological_process	cellular process
csin100522	ADP-ribosylation factor-like protein 8B-A	GO:0051716	biological_process	cellular response to stimulus
csin100522	ADP-ribosylation factor-like protein 8B-A	GO:0050794	biological_process	regulation of cellular process
csin100522	ADP-ribosylation factor-like protein 8B-A	GO:0023052	biological_process	signaling
csin100522	ADP-ribosylation factor-like protein 8B-A	GO:0050896	biological_process	response to stimulus
csin100522	ADP-ribosylation factor-like protein 8B-A	GO:0065007	biological_process	biological regulation
csin100522	ADP-ribosylation factor-like protein 8B-A	GO:0050789	biological_process	regulation of biological process
csin100549	Serine protease 33	GO:0003824	molecular_function	catalytic activity
csin100549	Serine protease 33	GO:0016787	molecular_function	hydrolase activity
csin100549	Serine protease 33	GO:0008152	biological_process	metabolic process
csin100549	Serine protease 33	GO:0043170	biological_process	macromolecule metabolic process
csin100549	Serine protease 33	GO:0044238	biological_process	primary metabolic process
csin100705	Retrovirus-related Pol polyprotein from type-2 retrotransposable element R2D	GO:0003824	molecular_function	catalytic activity
csin100705	Retrovirus-related Pol polyprotein from type-2 retrotransposable element R2D	GO:0016740	molecular_function	transferase activity
csin100705	Retrovirus-related Pol polyprotein from type-2 retrotransposable element R2D	GO:0005488	molecular_function	binding
csin100705	Retrovirus-related Pol polyprotein from type-2 retrotransposable element R2D	GO:0003676	molecular_function	nucleic acid binding
csin100705	Retrovirus-related Pol polyprotein from type-2 retrotransposable element R2D	GO:0043167	molecular_function	ion binding
csin100705	Retrovirus-related Pol polyprotein from type-2 retrotransposable element R2D	GO:0008152	biological_process	metabolic process
csin100705	Retrovirus-related Pol polyprotein from type-2 retrotransposable element R2D	GO:0006807	biological_process	nitrogen compound metabolic process
csin100705	Retrovirus-related Pol polyprotein from type-2 retrotransposable element R2D	GO:0009058	biological_process	biosynthetic process
csin100705	Retrovirus-related Pol polyprotein from type-2 retrotransposable element R2D	GO:0043170	biological_process	macromolecule metabolic process
csin100705	Retrovirus-related Pol polyprotein from type-2 retrotransposable element R2D	GO:0044237	biological_process	cellular metabolic process
csin100705	Retrovirus-related Pol polyprotein from type-2 retrotransposable element R2D	GO:0044238	biological_process	primary metabolic process
csin100705	Retrovirus-related Pol polyprotein from type-2 retrotransposable element R2D	GO:0009987	biological_process	cellular process
csin100725	Calumenin-B	GO:0005488	molecular_function	binding
csin100725	Calumenin-B	GO:0043167	molecular_function	ion binding
csin101110	NPC2; Niemann-Pick disease, type C2; K13443 Niemann-Pick C2 protein	GO:0005488	molecular_function	binding
csin101110	NPC2; Niemann-Pick disease, type C2; K13443 Niemann-Pick C2 protein	GO:0005515	molecular_function	protein binding
csin101110	NPC2; Niemann-Pick disease, type C2; K13443 Niemann-Pick C2 protein	GO:0008289	molecular_function	lipid binding
csin101110	NPC2; Niemann-Pick disease, type C2; K13443 Niemann-Pick C2 protein	GO:0008152	biological_process	metabolic process
csin101110	NPC2; Niemann-Pick disease, type C2; K13443 Niemann-Pick C2 protein	GO:0044237	biological_process	cellular metabolic process
csin101110	NPC2; Niemann-Pick disease, type C2; K13443 Niemann-Pick C2 protein	GO:0044238	biological_process	primary metabolic process
csin101110	NPC2; Niemann-Pick disease, type C2; K13443 Niemann-Pick C2 protein	GO:0019222	biological_process	regulation of metabolic process
csin101110	NPC2; Niemann-Pick disease, type C2; K13443 Niemann-Pick C2 protein	GO:0009987	biological_process	cellular process
csin101110	NPC2; Niemann-Pick disease, type C2; K13443 Niemann-Pick C2 protein	GO:0051641	biological_process	cellular localization
csin101110	NPC2; Niemann-Pick disease, type C2; K13443 Niemann-Pick C2 protein	GO:0050794	biological_process	regulation of cellular process
csin101110	NPC2; Niemann-Pick disease, type C2; K13443 Niemann-Pick C2 protein	GO:0050896	biological_process	response to stimulus
csin101110	NPC2; Niemann-Pick disease, type C2; K13443 Niemann-Pick C2 protein	GO:0009607	biological_process	response to biotic stimulus
csin101110	NPC2; Niemann-Pick disease, type C2; K13443 Niemann-Pick C2 protein	GO:0051179	biological_process	localization
csin101110	NPC2; Niemann-Pick disease, type C2; K13443 Niemann-Pick C2 protein	GO:0033036	biological_process	macromolecule localization
csin101110	NPC2; Niemann-Pick disease, type C2; K13443 Niemann-Pick C2 protein	GO:0051234	biological_process	establishment of localization
csin101110	NPC2; Niemann-Pick disease, type C2; K13443 Niemann-Pick C2 protein	GO:0051704	biological_process	multi-organism process
csin101110	NPC2; Niemann-Pick disease, type C2; K13443 Niemann-Pick C2 protein	GO:0065007	biological_process	biological regulation
csin101110	NPC2; Niemann-Pick disease, type C2; K13443 Niemann-Pick C2 protein	GO:0050789	biological_process	regulation of biological process
csin101110	NPC2; Niemann-Pick disease, type C2; K13443 Niemann-Pick C2 protein	GO:0065008	biological_process	regulation of biological quality
csin101111	hypothetical protein	GO:0005488	molecular_function	binding
csin101111	hypothetical protein	GO:0005515	molecular_function	protein binding
csin101111	hypothetical protein	GO:0008289	molecular_function	lipid binding
csin101111	hypothetical protein	GO:0009987	biological_process	cellular process
csin101111	hypothetical protein	GO:0051641	biological_process	cellular localization
csin101111	hypothetical protein	GO:0050896	biological_process	response to stimulus
csin101111	hypothetical protein	GO:0009607	biological_process	response to biotic stimulus
csin101111	hypothetical protein	GO:0051179	biological_process	localization
csin101111	hypothetical protein	GO:0033036	biological_process	macromolecule localization
csin101111	hypothetical protein	GO:0051234	biological_process	establishment of localization
csin101111	hypothetical protein	GO:0051704	biological_process	multi-organism process
csin101111	hypothetical protein	GO:0065007	biological_process	biological regulation
csin101111	hypothetical protein	GO:0065008	biological_process	regulation of biological quality
csin101196	ubiquitin-conjugating enzyme E2 I ; K10577 ubiquitin-conjugating enzyme E2 I	GO:0003824	molecular_function	catalytic activity
csin101196	ubiquitin-conjugating enzyme E2 I ; K10577 ubiquitin-conjugating enzyme E2 I	GO:0016874	molecular_function	ligase activity
csin101196	ubiquitin-conjugating enzyme E2 I ; K10577 ubiquitin-conjugating enzyme E2 I	GO:0005488	molecular_function	binding
csin101196	ubiquitin-conjugating enzyme E2 I ; K10577 ubiquitin-conjugating enzyme E2 I	GO:0000166	molecular_function	nucleotide binding
csin101196	ubiquitin-conjugating enzyme E2 I ; K10577 ubiquitin-conjugating enzyme E2 I	GO:0005515	molecular_function	protein binding
csin101196	ubiquitin-conjugating enzyme E2 I ; K10577 ubiquitin-conjugating enzyme E2 I	GO:0002376	biological_process	immune system process
csin101196	ubiquitin-conjugating enzyme E2 I ; K10577 ubiquitin-conjugating enzyme E2 I	GO:0002520	biological_process	immune system development
csin101196	ubiquitin-conjugating enzyme E2 I ; K10577 ubiquitin-conjugating enzyme E2 I	GO:0006955	biological_process	immune response
csin101196	ubiquitin-conjugating enzyme E2 I ; K10577 ubiquitin-conjugating enzyme E2 I	GO:0035172	biological_process	hemocyte proliferation
csin101196	ubiquitin-conjugating enzyme E2 I ; K10577 ubiquitin-conjugating enzyme E2 I	GO:0042386	biological_process	hemocyte differentiation
csin101196	ubiquitin-conjugating enzyme E2 I ; K10577 ubiquitin-conjugating enzyme E2 I	GO:0002682	biological_process	regulation of immune system process
csin101196	ubiquitin-conjugating enzyme E2 I ; K10577 ubiquitin-conjugating enzyme E2 I	GO:0008152	biological_process	metabolic process
csin101196	ubiquitin-conjugating enzyme E2 I ; K10577 ubiquitin-conjugating enzyme E2 I	GO:0043170	biological_process	macromolecule metabolic process
csin101196	ubiquitin-conjugating enzyme E2 I ; K10577 ubiquitin-conjugating enzyme E2 I	GO:0044237	biological_process	cellular metabolic process
csin101196	ubiquitin-conjugating enzyme E2 I ; K10577 ubiquitin-conjugating enzyme E2 I	GO:0044238	biological_process	primary metabolic process
csin101196	ubiquitin-conjugating enzyme E2 I ; K10577 ubiquitin-conjugating enzyme E2 I	GO:0008283	biological_process	cell proliferation
csin101196	ubiquitin-conjugating enzyme E2 I ; K10577 ubiquitin-conjugating enzyme E2 I	GO:0008285	biological_process	negative regulation of cell proliferation
csin101196	ubiquitin-conjugating enzyme E2 I ; K10577 ubiquitin-conjugating enzyme E2 I	GO:0042127	biological_process	regulation of cell proliferation
csin101196	ubiquitin-conjugating enzyme E2 I ; K10577 ubiquitin-conjugating enzyme E2 I	GO:0009987	biological_process	cellular process
csin101196	ubiquitin-conjugating enzyme E2 I ; K10577 ubiquitin-conjugating enzyme E2 I	GO:0007049	biological_process	cell cycle
csin101196	ubiquitin-conjugating enzyme E2 I ; K10577 ubiquitin-conjugating enzyme E2 I	GO:0007059	biological_process	chromosome segregation
csin101196	ubiquitin-conjugating enzyme E2 I ; K10577 ubiquitin-conjugating enzyme E2 I	GO:0007154	biological_process	cell communication
csin101196	ubiquitin-conjugating enzyme E2 I ; K10577 ubiquitin-conjugating enzyme E2 I	GO:0048869	biological_process	cellular developmental process
csin101196	ubiquitin-conjugating enzyme E2 I ; K10577 ubiquitin-conjugating enzyme E2 I	GO:0051641	biological_process	cellular localization
csin101196	ubiquitin-conjugating enzyme E2 I ; K10577 ubiquitin-conjugating enzyme E2 I	GO:0051716	biological_process	cellular response to stimulus
csin101196	ubiquitin-conjugating enzyme E2 I ; K10577 ubiquitin-conjugating enzyme E2 I	GO:0048523	biological_process	negative regulation of cellular process
csin101196	ubiquitin-conjugating enzyme E2 I ; K10577 ubiquitin-conjugating enzyme E2 I	GO:0050794	biological_process	regulation of cellular process
csin101196	ubiquitin-conjugating enzyme E2 I ; K10577 ubiquitin-conjugating enzyme E2 I	GO:0023052	biological_process	signaling
csin101196	ubiquitin-conjugating enzyme E2 I ; K10577 ubiquitin-conjugating enzyme E2 I	GO:0023051	biological_process	regulation of signaling
csin101196	ubiquitin-conjugating enzyme E2 I ; K10577 ubiquitin-conjugating enzyme E2 I	GO:0032501	biological_process	multicellular organismal process
csin101196	ubiquitin-conjugating enzyme E2 I ; K10577 ubiquitin-conjugating enzyme E2 I	GO:0007275	biological_process	multicellular organismal development
csin101196	ubiquitin-conjugating enzyme E2 I ; K10577 ubiquitin-conjugating enzyme E2 I	GO:0051239	biological_process	regulation of multicellular organismal process
csin101196	ubiquitin-conjugating enzyme E2 I ; K10577 ubiquitin-conjugating enzyme E2 I	GO:0032502	biological_process	developmental process
csin101196	ubiquitin-conjugating enzyme E2 I ; K10577 ubiquitin-conjugating enzyme E2 I	GO:0009653	biological_process	anatomical structure morphogenesis
csin101196	ubiquitin-conjugating enzyme E2 I ; K10577 ubiquitin-conjugating enzyme E2 I	GO:0048856	biological_process	anatomical structure development
csin101196	ubiquitin-conjugating enzyme E2 I ; K10577 ubiquitin-conjugating enzyme E2 I	GO:0050793	biological_process	regulation of developmental process
csin101196	ubiquitin-conjugating enzyme E2 I ; K10577 ubiquitin-conjugating enzyme E2 I	GO:0050896	biological_process	response to stimulus
csin101196	ubiquitin-conjugating enzyme E2 I ; K10577 ubiquitin-conjugating enzyme E2 I	GO:0006950	biological_process	response to stress
csin101196	ubiquitin-conjugating enzyme E2 I ; K10577 ubiquitin-conjugating enzyme E2 I	GO:0009719	biological_process	response to endogenous stimulus
csin101196	ubiquitin-conjugating enzyme E2 I ; K10577 ubiquitin-conjugating enzyme E2 I	GO:0042221	biological_process	response to chemical stimulus
csin101196	ubiquitin-conjugating enzyme E2 I ; K10577 ubiquitin-conjugating enzyme E2 I	GO:0048583	biological_process	regulation of response to stimulus
csin101196	ubiquitin-conjugating enzyme E2 I ; K10577 ubiquitin-conjugating enzyme E2 I	GO:0051179	biological_process	localization
csin101196	ubiquitin-conjugating enzyme E2 I ; K10577 ubiquitin-conjugating enzyme E2 I	GO:0033036	biological_process	macromolecule localization
csin101196	ubiquitin-conjugating enzyme E2 I ; K10577 ubiquitin-conjugating enzyme E2 I	GO:0051234	biological_process	establishment of localization
csin101196	ubiquitin-conjugating enzyme E2 I ; K10577 ubiquitin-conjugating enzyme E2 I	GO:0065007	biological_process	biological regulation
csin101196	ubiquitin-conjugating enzyme E2 I ; K10577 ubiquitin-conjugating enzyme E2 I	GO:0050789	biological_process	regulation of biological process
csin101200	subfamily M23B non-peptidase homologue (M23 family) ; K06560 mannose recepto	GO:0005488	molecular_function	binding
csin101200	subfamily M23B non-peptidase homologue (M23 family) ; K06560 mannose recepto	GO:0030246	molecular_function	carbohydrate binding
csin101200	subfamily M23B non-peptidase homologue (M23 family) ; K06560 mannose recepto	GO:0060089	molecular_function	molecular transducer activity
csin101200	subfamily M23B non-peptidase homologue (M23 family) ; K06560 mannose recepto	GO:0004871	molecular_function	signal transducer activity
csin101200	subfamily M23B non-peptidase homologue (M23 family) ; K06560 mannose recepto	GO:0009987	biological_process	cellular process
csin101200	subfamily M23B non-peptidase homologue (M23 family) ; K06560 mannose recepto	GO:0016044	biological_process	cellular membrane organization
csin101200	subfamily M23B non-peptidase homologue (M23 family) ; K06560 mannose recepto	GO:0016192	biological_process	vesicle-mediated transport
csin101200	subfamily M23B non-peptidase homologue (M23 family) ; K06560 mannose recepto	GO:0051179	biological_process	localization
csin101200	subfamily M23B non-peptidase homologue (M23 family) ; K06560 mannose recepto	GO:0051234	biological_process	establishment of localization
csin101200	subfamily M23B non-peptidase homologue (M23 family) ; K06560 mannose recepto	GO:0071840	biological_process	cellular component organization or biogenesis
csin101200	subfamily M23B non-peptidase homologue (M23 family) ; K06560 mannose recepto	GO:0016043	biological_process	cellular component organization
csin101577	Serine/threonine-protein phosphatase PGAM5, mitochondrial	GO:0003824	molecular_function	catalytic activity
csin101577	Serine/threonine-protein phosphatase PGAM5, mitochondrial	GO:0016787	molecular_function	hydrolase activity
csin101613	Lysosomal alpha-glucosidase	GO:0003824	molecular_function	catalytic activity
csin101613	Lysosomal alpha-glucosidase	GO:0016787	molecular_function	hydrolase activity
csin101613	Lysosomal alpha-glucosidase	GO:0005488	molecular_function	binding
csin101613	Lysosomal alpha-glucosidase	GO:0030246	molecular_function	carbohydrate binding
csin101613	Lysosomal alpha-glucosidase	GO:0008152	biological_process	metabolic process
csin101613	Lysosomal alpha-glucosidase	GO:0009056	biological_process	catabolic process
csin101613	Lysosomal alpha-glucosidase	GO:0043170	biological_process	macromolecule metabolic process
csin101613	Lysosomal alpha-glucosidase	GO:0044237	biological_process	cellular metabolic process
csin101613	Lysosomal alpha-glucosidase	GO:0044238	biological_process	primary metabolic process
csin101613	Lysosomal alpha-glucosidase	GO:0055114	biological_process	oxidation-reduction process
csin101613	Lysosomal alpha-glucosidase	GO:0009987	biological_process	cellular process
csin101613	Lysosomal alpha-glucosidase	GO:0019725	biological_process	cellular homeostasis
csin101613	Lysosomal alpha-glucosidase	GO:0051641	biological_process	cellular localization
csin101613	Lysosomal alpha-glucosidase	GO:0071841	biological_process	cellular component organization or biogenesis at cellular level
csin101613	Lysosomal alpha-glucosidase	GO:0032501	biological_process	multicellular organismal process
csin101613	Lysosomal alpha-glucosidase	GO:0003008	biological_process	system process
csin101613	Lysosomal alpha-glucosidase	GO:0007275	biological_process	multicellular organismal development
csin101613	Lysosomal alpha-glucosidase	GO:0007585	biological_process	respiratory gaseous exchange
csin101613	Lysosomal alpha-glucosidase	GO:0050879	biological_process	multicellular organismal movement
csin101613	Lysosomal alpha-glucosidase	GO:0051239	biological_process	regulation of multicellular organismal process
csin101613	Lysosomal alpha-glucosidase	GO:0032502	biological_process	developmental process
csin101613	Lysosomal alpha-glucosidase	GO:0009653	biological_process	anatomical structure morphogenesis
csin101613	Lysosomal alpha-glucosidase	GO:0048856	biological_process	anatomical structure development
csin101613	Lysosomal alpha-glucosidase	GO:0050896	biological_process	response to stimulus
csin101613	Lysosomal alpha-glucosidase	GO:0007610	biological_process	behavior
csin101613	Lysosomal alpha-glucosidase	GO:0051179	biological_process	localization
csin101613	Lysosomal alpha-glucosidase	GO:0051235	biological_process	maintenance of location
csin101613	Lysosomal alpha-glucosidase	GO:0065007	biological_process	biological regulation
csin101613	Lysosomal alpha-glucosidase	GO:0050789	biological_process	regulation of biological process
csin101613	Lysosomal alpha-glucosidase	GO:0065008	biological_process	regulation of biological quality
csin101613	Lysosomal alpha-glucosidase	GO:0071840	biological_process	cellular component organization or biogenesis
csin101613	Lysosomal alpha-glucosidase	GO:0016043	biological_process	cellular component organization
csin101868	COL12A1; collagen, type XII, alpha 1; K08132 collagen, type XII, alpha	GO:0005198	molecular_function	structural molecule activity
csin101868	COL12A1; collagen, type XII, alpha 1; K08132 collagen, type XII, alpha	GO:0005201	molecular_function	extracellular matrix structural constituent
csin101868	COL12A1; collagen, type XII, alpha 1; K08132 collagen, type XII, alpha	GO:0009987	biological_process	cellular process
csin101868	COL12A1; collagen, type XII, alpha 1; K08132 collagen, type XII, alpha	GO:0007155	biological_process	cell adhesion
csin101868	COL12A1; collagen, type XII, alpha 1; K08132 collagen, type XII, alpha	GO:0071841	biological_process	cellular component organization or biogenesis at cellular level
csin101868	COL12A1; collagen, type XII, alpha 1; K08132 collagen, type XII, alpha	GO:0022610	biological_process	biological adhesion
csin101868	COL12A1; collagen, type XII, alpha 1; K08132 collagen, type XII, alpha	GO:0032501	biological_process	multicellular organismal process
csin101868	COL12A1; collagen, type XII, alpha 1; K08132 collagen, type XII, alpha	GO:0007275	biological_process	multicellular organismal development
csin101868	COL12A1; collagen, type XII, alpha 1; K08132 collagen, type XII, alpha	GO:0032502	biological_process	developmental process
csin101868	COL12A1; collagen, type XII, alpha 1; K08132 collagen, type XII, alpha	GO:0048856	biological_process	anatomical structure development
csin101868	COL12A1; collagen, type XII, alpha 1; K08132 collagen, type XII, alpha	GO:0071840	biological_process	cellular component organization or biogenesis
csin101868	COL12A1; collagen, type XII, alpha 1; K08132 collagen, type XII, alpha	GO:0016043	biological_process	cellular component organization
csin102016	RNA polymerase-associated protein LEO1	GO:0005488	molecular_function	binding
csin102016	RNA polymerase-associated protein LEO1	GO:0005515	molecular_function	protein binding
csin102016	RNA polymerase-associated protein LEO1	GO:0008152	biological_process	metabolic process
csin102016	RNA polymerase-associated protein LEO1	GO:0006807	biological_process	nitrogen compound metabolic process
csin102016	RNA polymerase-associated protein LEO1	GO:0009058	biological_process	biosynthetic process
csin102016	RNA polymerase-associated protein LEO1	GO:0043170	biological_process	macromolecule metabolic process
csin102016	RNA polymerase-associated protein LEO1	GO:0044237	biological_process	cellular metabolic process
csin102016	RNA polymerase-associated protein LEO1	GO:0044238	biological_process	primary metabolic process
csin102016	RNA polymerase-associated protein LEO1	GO:0019222	biological_process	regulation of metabolic process
csin102016	RNA polymerase-associated protein LEO1	GO:0009987	biological_process	cellular process
csin102016	RNA polymerase-associated protein LEO1	GO:0071841	biological_process	cellular component organization or biogenesis at cellular level
csin102016	RNA polymerase-associated protein LEO1	GO:0050794	biological_process	regulation of cellular process
csin102016	RNA polymerase-associated protein LEO1	GO:0065007	biological_process	biological regulation
csin102016	RNA polymerase-associated protein LEO1	GO:0050789	biological_process	regulation of biological process
csin102016	RNA polymerase-associated protein LEO1	GO:0071840	biological_process	cellular component organization or biogenesis
csin102016	RNA polymerase-associated protein LEO1	GO:0016043	biological_process	cellular component organization
csin102090	protein-tyrosine sulfotransferase ; K01021 protein-tyrosine sulfotransferase	GO:0003824	molecular_function	catalytic activity
csin102090	protein-tyrosine sulfotransferase ; K01021 protein-tyrosine sulfotransferase	GO:0016740	molecular_function	transferase activity
csin102090	protein-tyrosine sulfotransferase ; K01021 protein-tyrosine sulfotransferase	GO:0008152	biological_process	metabolic process
csin102090	protein-tyrosine sulfotransferase ; K01021 protein-tyrosine sulfotransferase	GO:0043170	biological_process	macromolecule metabolic process
csin102090	protein-tyrosine sulfotransferase ; K01021 protein-tyrosine sulfotransferase	GO:0044237	biological_process	cellular metabolic process
csin102090	protein-tyrosine sulfotransferase ; K01021 protein-tyrosine sulfotransferase	GO:0044238	biological_process	primary metabolic process
csin102090	protein-tyrosine sulfotransferase ; K01021 protein-tyrosine sulfotransferase	GO:0009987	biological_process	cellular process
csin102173	Tyrosinase	GO:0003824	molecular_function	catalytic activity
csin102173	Tyrosinase	GO:0016491	molecular_function	oxidoreductase activity
csin102173	Tyrosinase	GO:0005488	molecular_function	binding
csin102173	Tyrosinase	GO:0005515	molecular_function	protein binding
csin102173	Tyrosinase	GO:0043167	molecular_function	ion binding
csin102173	Tyrosinase	GO:0002376	biological_process	immune system process
csin102173	Tyrosinase	GO:0002520	biological_process	immune system development
csin102173	Tyrosinase	GO:0008152	biological_process	metabolic process
csin102173	Tyrosinase	GO:0009058	biological_process	biosynthetic process
csin102173	Tyrosinase	GO:0019748	biological_process	secondary metabolic process
csin102173	Tyrosinase	GO:0042440	biological_process	pigment metabolic process
csin102173	Tyrosinase	GO:0044237	biological_process	cellular metabolic process
csin102173	Tyrosinase	GO:0008283	biological_process	cell proliferation
csin102173	Tyrosinase	GO:0009987	biological_process	cellular process
csin102173	Tyrosinase	GO:0032501	biological_process	multicellular organismal process
csin102173	Tyrosinase	GO:0007275	biological_process	multicellular organismal development
csin102173	Tyrosinase	GO:0032502	biological_process	developmental process
csin102173	Tyrosinase	GO:0048856	biological_process	anatomical structure development
csin102173	Tyrosinase	GO:0043473	biological_process	pigmentation
csin102187	beta-13-glucuronyltransferase ; K10158 galactosylgalactosylxylosylprotein 3-	GO:0003824	molecular_function	catalytic activity
csin102187	beta-13-glucuronyltransferase ; K10158 galactosylgalactosylxylosylprotein 3-	GO:0016740	molecular_function	transferase activity
csin102231	Frizzled	GO:0060089	molecular_function	molecular transducer activity
csin102231	Frizzled	GO:0004871	molecular_function	signal transducer activity
csin102231	Frizzled	GO:0009987	biological_process	cellular process
csin102231	Frizzled	GO:0007163	biological_process	establishment or maintenance of cell polarity
csin102231	Frizzled	GO:0051716	biological_process	cellular response to stimulus
csin102231	Frizzled	GO:0050794	biological_process	regulation of cellular process
csin102231	Frizzled	GO:0023052	biological_process	signaling
csin102231	Frizzled	GO:0032501	biological_process	multicellular organismal process
csin102231	Frizzled	GO:0007275	biological_process	multicellular organismal development
csin102231	Frizzled	GO:0032502	biological_process	developmental process
csin102231	Frizzled	GO:0050896	biological_process	response to stimulus
csin102231	Frizzled	GO:0065007	biological_process	biological regulation
csin102231	Frizzled	GO:0050789	biological_process	regulation of biological process
csin102310	Kunitz protease inhibitor 4	GO:0030234	molecular_function	enzyme regulator activity
csin102310	Kunitz protease inhibitor 4	GO:0004857	molecular_function	enzyme inhibitor activity
csin102310	Kunitz protease inhibitor 4	GO:0010576	molecular_function	metalloenzyme regulator activity
csin102310	Kunitz protease inhibitor 4	GO:0061134	molecular_function	peptidase regulator activity
csin102310	Kunitz protease inhibitor 4	GO:0009987	biological_process	cellular process
csin102310	Kunitz protease inhibitor 4	GO:0051716	biological_process	cellular response to stimulus
csin102310	Kunitz protease inhibitor 4	GO:0050794	biological_process	regulation of cellular process
csin102310	Kunitz protease inhibitor 4	GO:0023052	biological_process	signaling
csin102310	Kunitz protease inhibitor 4	GO:0050896	biological_process	response to stimulus
csin102310	Kunitz protease inhibitor 4	GO:0065007	biological_process	biological regulation
csin102310	Kunitz protease inhibitor 4	GO:0050789	biological_process	regulation of biological process
csin102323	Kunitoxin-Tel1	GO:0030234	molecular_function	enzyme regulator activity
csin102323	Kunitoxin-Tel1	GO:0004857	molecular_function	enzyme inhibitor activity
csin102323	Kunitoxin-Tel1	GO:0061134	molecular_function	peptidase regulator activity
csin102323	Kunitoxin-Tel1	GO:0032501	biological_process	multicellular organismal process
csin102323	Kunitoxin-Tel1	GO:0050817	biological_process	coagulation
csin102323	Kunitoxin-Tel1	GO:0050878	biological_process	regulation of body fluid levels
csin102323	Kunitoxin-Tel1	GO:0050896	biological_process	response to stimulus
csin102323	Kunitoxin-Tel1	GO:0006950	biological_process	response to stress
csin102323	Kunitoxin-Tel1	GO:0065007	biological_process	biological regulation
csin102323	Kunitoxin-Tel1	GO:0065008	biological_process	regulation of biological quality
csin102537	Suppressor/enhancer of lin-12 protein 9	GO:0051179	biological_process	localization
csin102537	Suppressor/enhancer of lin-12 protein 9	GO:0051234	biological_process	establishment of localization
csin102611	Chymotrypsinogen A	GO:0003824	molecular_function	catalytic activity
csin102611	Chymotrypsinogen A	GO:0016787	molecular_function	hydrolase activity
csin102611	Chymotrypsinogen A	GO:0008152	biological_process	metabolic process
csin102611	Chymotrypsinogen A	GO:0043170	biological_process	macromolecule metabolic process
csin102611	Chymotrypsinogen A	GO:0044238	biological_process	primary metabolic process
csin102644	dihydroorotate dehydrogenase (EC:1.3.3.1); K00254 dihydroorotate dehydrogena	GO:0003824	molecular_function	catalytic activity
csin102644	dihydroorotate dehydrogenase (EC:1.3.3.1); K00254 dihydroorotate dehydrogena	GO:0016491	molecular_function	oxidoreductase activity
csin102644	dihydroorotate dehydrogenase (EC:1.3.3.1); K00254 dihydroorotate dehydrogena	GO:0008152	biological_process	metabolic process
csin102644	dihydroorotate dehydrogenase (EC:1.3.3.1); K00254 dihydroorotate dehydrogena	GO:0006807	biological_process	nitrogen compound metabolic process
csin102644	dihydroorotate dehydrogenase (EC:1.3.3.1); K00254 dihydroorotate dehydrogena	GO:0009058	biological_process	biosynthetic process
csin102644	dihydroorotate dehydrogenase (EC:1.3.3.1); K00254 dihydroorotate dehydrogena	GO:0044237	biological_process	cellular metabolic process
csin102644	dihydroorotate dehydrogenase (EC:1.3.3.1); K00254 dihydroorotate dehydrogena	GO:0044238	biological_process	primary metabolic process
csin102644	dihydroorotate dehydrogenase (EC:1.3.3.1); K00254 dihydroorotate dehydrogena	GO:0044281	biological_process	small molecule metabolic process
csin102644	dihydroorotate dehydrogenase (EC:1.3.3.1); K00254 dihydroorotate dehydrogena	GO:0055114	biological_process	oxidation-reduction process
csin102644	dihydroorotate dehydrogenase (EC:1.3.3.1); K00254 dihydroorotate dehydrogena	GO:0009987	biological_process	cellular process
csin102666	CTD nuclear envelope phosphatase 1	GO:0003824	molecular_function	catalytic activity
csin102666	CTD nuclear envelope phosphatase 1	GO:0016787	molecular_function	hydrolase activity
csin102666	CTD nuclear envelope phosphatase 1	GO:0008152	biological_process	metabolic process
csin102666	CTD nuclear envelope phosphatase 1	GO:0043170	biological_process	macromolecule metabolic process
csin102666	CTD nuclear envelope phosphatase 1	GO:0044237	biological_process	cellular metabolic process
csin102666	CTD nuclear envelope phosphatase 1	GO:0044238	biological_process	primary metabolic process
csin102666	CTD nuclear envelope phosphatase 1	GO:0009987	biological_process	cellular process
csin102666	CTD nuclear envelope phosphatase 1	GO:0016044	biological_process	cellular membrane organization
csin102666	CTD nuclear envelope phosphatase 1	GO:0071841	biological_process	cellular component organization or biogenesis at cellular level
csin102666	CTD nuclear envelope phosphatase 1	GO:0071840	biological_process	cellular component organization or biogenesis
csin102666	CTD nuclear envelope phosphatase 1	GO:0016043	biological_process	cellular component organization
csin102669	Cathepsin B-like cysteine proteinase	GO:0003824	molecular_function	catalytic activity
csin102669	Cathepsin B-like cysteine proteinase	GO:0016787	molecular_function	hydrolase activity
csin102669	Cathepsin B-like cysteine proteinase	GO:0008152	biological_process	metabolic process
csin102669	Cathepsin B-like cysteine proteinase	GO:0043170	biological_process	macromolecule metabolic process
csin102669	Cathepsin B-like cysteine proteinase	GO:0044238	biological_process	primary metabolic process
csin102716	ETS domain-containing protein Elk-4	GO:0001071	molecular_function	nucleic acid binding transcription factor activity
csin102716	ETS domain-containing protein Elk-4	GO:0003700	molecular_function	sequence-specific DNA binding transcription factor activity
csin102716	ETS domain-containing protein Elk-4	GO:0005488	molecular_function	binding
csin102716	ETS domain-containing protein Elk-4	GO:0003676	molecular_function	nucleic acid binding
csin102716	ETS domain-containing protein Elk-4	GO:0008152	biological_process	metabolic process
csin102716	ETS domain-containing protein Elk-4	GO:0006807	biological_process	nitrogen compound metabolic process
csin102716	ETS domain-containing protein Elk-4	GO:0009058	biological_process	biosynthetic process
csin102716	ETS domain-containing protein Elk-4	GO:0043170	biological_process	macromolecule metabolic process
csin102716	ETS domain-containing protein Elk-4	GO:0044237	biological_process	cellular metabolic process
csin102716	ETS domain-containing protein Elk-4	GO:0044238	biological_process	primary metabolic process
csin102716	ETS domain-containing protein Elk-4	GO:0019222	biological_process	regulation of metabolic process
csin102716	ETS domain-containing protein Elk-4	GO:0009987	biological_process	cellular process
csin102716	ETS domain-containing protein Elk-4	GO:0050794	biological_process	regulation of cellular process
csin102716	ETS domain-containing protein Elk-4	GO:0065007	biological_process	biological regulation
csin102716	ETS domain-containing protein Elk-4	GO:0050789	biological_process	regulation of biological process
csin102728	Netrin receptor UNC5C	GO:0060089	molecular_function	molecular transducer activity
csin102728	Netrin receptor UNC5C	GO:0004871	molecular_function	signal transducer activity
csin102728	Netrin receptor UNC5C	GO:0009987	biological_process	cellular process
csin102728	Netrin receptor UNC5C	GO:0008219	biological_process	cell death
csin102728	Netrin receptor UNC5C	GO:0051716	biological_process	cellular response to stimulus
csin102728	Netrin receptor UNC5C	GO:0050794	biological_process	regulation of cellular process
csin102728	Netrin receptor UNC5C	GO:0016265	biological_process	death
csin102728	Netrin receptor UNC5C	GO:0023052	biological_process	signaling
csin102728	Netrin receptor UNC5C	GO:0032501	biological_process	multicellular organismal process
csin102728	Netrin receptor UNC5C	GO:0007275	biological_process	multicellular organismal development
csin102728	Netrin receptor UNC5C	GO:0032502	biological_process	developmental process
csin102728	Netrin receptor UNC5C	GO:0050896	biological_process	response to stimulus
csin102728	Netrin receptor UNC5C	GO:0065007	biological_process	biological regulation
csin102728	Netrin receptor UNC5C	GO:0050789	biological_process	regulation of biological process
csin102767	Iron/zinc purple acid phosphatase-like protein	GO:0003824	molecular_function	catalytic activity
csin102767	Iron/zinc purple acid phosphatase-like protein	GO:0016787	molecular_function	hydrolase activity
csin102767	Iron/zinc purple acid phosphatase-like protein	GO:0005488	molecular_function	binding
csin102767	Iron/zinc purple acid phosphatase-like protein	GO:0043167	molecular_function	ion binding
csin102838	Dopamine beta-hydroxylase	GO:0003824	molecular_function	catalytic activity
csin102838	Dopamine beta-hydroxylase	GO:0016491	molecular_function	oxidoreductase activity
csin102838	Dopamine beta-hydroxylase	GO:0005488	molecular_function	binding
csin102838	Dopamine beta-hydroxylase	GO:0019842	molecular_function	vitamin binding
csin102838	Dopamine beta-hydroxylase	GO:0031406	molecular_function	carboxylic acid binding
csin102838	Dopamine beta-hydroxylase	GO:0043167	molecular_function	ion binding
csin102838	Dopamine beta-hydroxylase	GO:0000003	biological_process	reproduction
csin102838	Dopamine beta-hydroxylase	GO:0032504	biological_process	multicellular organism reproduction
csin102838	Dopamine beta-hydroxylase	GO:0022414	biological_process	reproductive process
csin102838	Dopamine beta-hydroxylase	GO:0002376	biological_process	immune system process
csin102838	Dopamine beta-hydroxylase	GO:0002252	biological_process	immune effector process
csin102838	Dopamine beta-hydroxylase	GO:0050900	biological_process	leukocyte migration
csin102838	Dopamine beta-hydroxylase	GO:0008152	biological_process	metabolic process
csin102838	Dopamine beta-hydroxylase	GO:0006807	biological_process	nitrogen compound metabolic process
csin102838	Dopamine beta-hydroxylase	GO:0009056	biological_process	catabolic process
csin102838	Dopamine beta-hydroxylase	GO:0009058	biological_process	biosynthetic process
csin102838	Dopamine beta-hydroxylase	GO:0044237	biological_process	cellular metabolic process
csin102838	Dopamine beta-hydroxylase	GO:0044281	biological_process	small molecule metabolic process
csin102838	Dopamine beta-hydroxylase	GO:0008283	biological_process	cell proliferation
csin102838	Dopamine beta-hydroxylase	GO:0042127	biological_process	regulation of cell proliferation
csin102838	Dopamine beta-hydroxylase	GO:0009987	biological_process	cellular process
csin102838	Dopamine beta-hydroxylase	GO:0006928	biological_process	cellular component movement
csin102838	Dopamine beta-hydroxylase	GO:0007154	biological_process	cell communication
csin102838	Dopamine beta-hydroxylase	GO:0008219	biological_process	cell death
csin102838	Dopamine beta-hydroxylase	GO:0051716	biological_process	cellular response to stimulus
csin102838	Dopamine beta-hydroxylase	GO:0050794	biological_process	regulation of cellular process
csin102838	Dopamine beta-hydroxylase	GO:0016265	biological_process	death
csin102838	Dopamine beta-hydroxylase	GO:0023052	biological_process	signaling
csin102838	Dopamine beta-hydroxylase	GO:0035637	biological_process	multicellular organismal signaling
csin102838	Dopamine beta-hydroxylase	GO:0032501	biological_process	multicellular organismal process
csin102838	Dopamine beta-hydroxylase	GO:0001816	biological_process	cytokine production
csin102838	Dopamine beta-hydroxylase	GO:0003008	biological_process	system process
csin102838	Dopamine beta-hydroxylase	GO:0007275	biological_process	multicellular organismal development
csin102838	Dopamine beta-hydroxylase	GO:0007632	biological_process	visual behavior
csin102838	Dopamine beta-hydroxylase	GO:0030534	biological_process	adult behavior
csin102838	Dopamine beta-hydroxylase	GO:0033555	biological_process	multicellular organismal response to stress
csin102838	Dopamine beta-hydroxylase	GO:0048771	biological_process	tissue remodeling
csin102838	Dopamine beta-hydroxylase	GO:0048871	biological_process	multicellular organismal homeostasis
csin102838	Dopamine beta-hydroxylase	GO:0051239	biological_process	regulation of multicellular organismal process
csin102838	Dopamine beta-hydroxylase	GO:0032502	biological_process	developmental process
csin102838	Dopamine beta-hydroxylase	GO:0007568	biological_process	aging
csin102838	Dopamine beta-hydroxylase	GO:0048856	biological_process	anatomical structure development
csin102838	Dopamine beta-hydroxylase	GO:0040011	biological_process	locomotion
csin102838	Dopamine beta-hydroxylase	GO:0050896	biological_process	response to stimulus
csin102838	Dopamine beta-hydroxylase	GO:0006950	biological_process	response to stress
csin102838	Dopamine beta-hydroxylase	GO:0007610	biological_process	behavior
csin102838	Dopamine beta-hydroxylase	GO:0009628	biological_process	response to abiotic stimulus
csin102838	Dopamine beta-hydroxylase	GO:0009719	biological_process	response to endogenous stimulus
csin102838	Dopamine beta-hydroxylase	GO:0042221	biological_process	response to chemical stimulus
csin102838	Dopamine beta-hydroxylase	GO:0051179	biological_process	localization
csin102838	Dopamine beta-hydroxylase	GO:0051674	biological_process	localization of cell
csin102838	Dopamine beta-hydroxylase	GO:0051704	biological_process	multi-organism process
csin102838	Dopamine beta-hydroxylase	GO:0065007	biological_process	biological regulation
csin102838	Dopamine beta-hydroxylase	GO:0050789	biological_process	regulation of biological process
csin102838	Dopamine beta-hydroxylase	GO:0065008	biological_process	regulation of biological quality
csin102894	TBC1 domain family member 22B	GO:0030234	molecular_function	enzyme regulator activity
csin102894	TBC1 domain family member 22B	GO:0008047	molecular_function	enzyme activator activity
csin102894	TBC1 domain family member 22B	GO:0060589	molecular_function	nucleoside-triphosphatase regulator activity
csin103066	Cathepsin B-like cysteine proteinase	GO:0003824	molecular_function	catalytic activity
csin103066	Cathepsin B-like cysteine proteinase	GO:0016787	molecular_function	hydrolase activity
csin103066	Cathepsin B-like cysteine proteinase	GO:0008152	biological_process	metabolic process
csin103066	Cathepsin B-like cysteine proteinase	GO:0043170	biological_process	macromolecule metabolic process
csin103066	Cathepsin B-like cysteine proteinase	GO:0044238	biological_process	primary metabolic process
csin103066	Cathepsin B-like cysteine proteinase	GO:0019222	biological_process	regulation of metabolic process
csin103066	Cathepsin B-like cysteine proteinase	GO:0065007	biological_process	biological regulation
csin103066	Cathepsin B-like cysteine proteinase	GO:0050789	biological_process	regulation of biological process
csin103066	Cathepsin B-like cysteine proteinase	GO:0065009	biological_process	regulation of molecular function
csin103068	Cathepsin B-like cysteine proteinase	GO:0003824	molecular_function	catalytic activity
csin103068	Cathepsin B-like cysteine proteinase	GO:0016787	molecular_function	hydrolase activity
csin103068	Cathepsin B-like cysteine proteinase	GO:0008152	biological_process	metabolic process
csin103068	Cathepsin B-like cysteine proteinase	GO:0043170	biological_process	macromolecule metabolic process
csin103068	Cathepsin B-like cysteine proteinase	GO:0044238	biological_process	primary metabolic process
csin103068	Cathepsin B-like cysteine proteinase	GO:0019222	biological_process	regulation of metabolic process
csin103068	Cathepsin B-like cysteine proteinase	GO:0065007	biological_process	biological regulation
csin103068	Cathepsin B-like cysteine proteinase	GO:0050789	biological_process	regulation of biological process
csin103068	Cathepsin B-like cysteine proteinase	GO:0065009	biological_process	regulation of molecular function
csin103126	hypothetical protein	GO:0005488	molecular_function	binding
csin103126	hypothetical protein	GO:0005515	molecular_function	protein binding
csin103126	hypothetical protein	GO:0008289	molecular_function	lipid binding
csin103126	hypothetical protein	GO:0008152	biological_process	metabolic process
csin103126	hypothetical protein	GO:0044237	biological_process	cellular metabolic process
csin103126	hypothetical protein	GO:0044238	biological_process	primary metabolic process
csin103126	hypothetical protein	GO:0019222	biological_process	regulation of metabolic process
csin103126	hypothetical protein	GO:0009987	biological_process	cellular process
csin103126	hypothetical protein	GO:0051641	biological_process	cellular localization
csin103126	hypothetical protein	GO:0050794	biological_process	regulation of cellular process
csin103126	hypothetical protein	GO:0050896	biological_process	response to stimulus
csin103126	hypothetical protein	GO:0009607	biological_process	response to biotic stimulus
csin103126	hypothetical protein	GO:0051179	biological_process	localization
csin103126	hypothetical protein	GO:0033036	biological_process	macromolecule localization
csin103126	hypothetical protein	GO:0051234	biological_process	establishment of localization
csin103126	hypothetical protein	GO:0051704	biological_process	multi-organism process
csin103126	hypothetical protein	GO:0065007	biological_process	biological regulation
csin103126	hypothetical protein	GO:0050789	biological_process	regulation of biological process
csin103126	hypothetical protein	GO:0065008	biological_process	regulation of biological quality
csin103250	hypothetical protein; K13443 Niemann-Pick C2 protein	GO:0005488	molecular_function	binding
csin103250	hypothetical protein; K13443 Niemann-Pick C2 protein	GO:0005515	molecular_function	protein binding
csin103250	hypothetical protein; K13443 Niemann-Pick C2 protein	GO:0008289	molecular_function	lipid binding
csin103250	hypothetical protein; K13443 Niemann-Pick C2 protein	GO:0009987	biological_process	cellular process
csin103250	hypothetical protein; K13443 Niemann-Pick C2 protein	GO:0051641	biological_process	cellular localization
csin103250	hypothetical protein; K13443 Niemann-Pick C2 protein	GO:0050896	biological_process	response to stimulus
csin103250	hypothetical protein; K13443 Niemann-Pick C2 protein	GO:0009607	biological_process	response to biotic stimulus
csin103250	hypothetical protein; K13443 Niemann-Pick C2 protein	GO:0051179	biological_process	localization
csin103250	hypothetical protein; K13443 Niemann-Pick C2 protein	GO:0033036	biological_process	macromolecule localization
csin103250	hypothetical protein; K13443 Niemann-Pick C2 protein	GO:0051234	biological_process	establishment of localization
csin103250	hypothetical protein; K13443 Niemann-Pick C2 protein	GO:0051704	biological_process	multi-organism process
csin103250	hypothetical protein; K13443 Niemann-Pick C2 protein	GO:0065007	biological_process	biological regulation
csin103250	hypothetical protein; K13443 Niemann-Pick C2 protein	GO:0065008	biological_process	regulation of biological quality
csin103348	Granulins	GO:0005488	molecular_function	binding
csin103348	Granulins	GO:0005515	molecular_function	protein binding
csin103348	Granulins	GO:0000003	biological_process	reproduction
csin103348	Granulins	GO:0022414	biological_process	reproductive process
csin103348	Granulins	GO:0008283	biological_process	cell proliferation
csin103348	Granulins	GO:0050673	biological_process	epithelial cell proliferation
csin103348	Granulins	GO:0008284	biological_process	positive regulation of cell proliferation
csin103348	Granulins	GO:0042127	biological_process	regulation of cell proliferation
csin103348	Granulins	GO:0009987	biological_process	cellular process
csin103348	Granulins	GO:0048522	biological_process	positive regulation of cellular process
csin103348	Granulins	GO:0050794	biological_process	regulation of cellular process
csin103348	Granulins	GO:0032501	biological_process	multicellular organismal process
csin103348	Granulins	GO:0007275	biological_process	multicellular organismal development
csin103348	Granulins	GO:0032502	biological_process	developmental process
csin103348	Granulins	GO:0048856	biological_process	anatomical structure development
csin103348	Granulins	GO:0071684	biological_process	organism emergence from protective structure
csin103348	Granulins	GO:0051704	biological_process	multi-organism process
csin103348	Granulins	GO:0065007	biological_process	biological regulation
csin103348	Granulins	GO:0050789	biological_process	regulation of biological process
csin103352	Granulins	GO:0005488	molecular_function	binding
csin103352	Granulins	GO:0005515	molecular_function	protein binding
csin103352	Granulins	GO:0009987	biological_process	cellular process
csin103352	Granulins	GO:0051716	biological_process	cellular response to stimulus
csin103352	Granulins	GO:0050794	biological_process	regulation of cellular process
csin103352	Granulins	GO:0023052	biological_process	signaling
csin103352	Granulins	GO:0050896	biological_process	response to stimulus
csin103352	Granulins	GO:0065007	biological_process	biological regulation
csin103352	Granulins	GO:0050789	biological_process	regulation of biological process
csin103451	Calumenin	GO:0003824	molecular_function	catalytic activity
csin103451	Calumenin	GO:0016853	molecular_function	isomerase activity
csin103451	Calumenin	GO:0005488	molecular_function	binding
csin103451	Calumenin	GO:0003676	molecular_function	nucleic acid binding
csin103451	Calumenin	GO:0043167	molecular_function	ion binding
csin103451	Calumenin	GO:0008152	biological_process	metabolic process
csin103451	Calumenin	GO:0006807	biological_process	nitrogen compound metabolic process
csin103451	Calumenin	GO:0009058	biological_process	biosynthetic process
csin103451	Calumenin	GO:0043170	biological_process	macromolecule metabolic process
csin103451	Calumenin	GO:0044237	biological_process	cellular metabolic process
csin103451	Calumenin	GO:0044238	biological_process	primary metabolic process
csin103451	Calumenin	GO:0009893	biological_process	positive regulation of metabolic process
csin103451	Calumenin	GO:0019222	biological_process	regulation of metabolic process
csin103451	Calumenin	GO:0009987	biological_process	cellular process
csin103451	Calumenin	GO:0071841	biological_process	cellular component organization or biogenesis at cellular level
csin103451	Calumenin	GO:0048522	biological_process	positive regulation of cellular process
csin103451	Calumenin	GO:0050794	biological_process	regulation of cellular process
csin103451	Calumenin	GO:0065007	biological_process	biological regulation
csin103451	Calumenin	GO:0050789	biological_process	regulation of biological process
csin103451	Calumenin	GO:0071840	biological_process	cellular component organization or biogenesis
csin103451	Calumenin	GO:0016043	biological_process	cellular component organization
csin103470	RPE-spondin	GO:0005488	molecular_function	binding
csin103470	RPE-spondin	GO:0001871	molecular_function	pattern binding
csin103470	RPE-spondin	GO:0030246	molecular_function	carbohydrate binding
csin103470	RPE-spondin	GO:0060089	molecular_function	molecular transducer activity
csin103470	RPE-spondin	GO:0004871	molecular_function	signal transducer activity
csin103470	RPE-spondin	GO:0002376	biological_process	immune system process
csin103470	RPE-spondin	GO:0006955	biological_process	immune response
csin103470	RPE-spondin	GO:0050896	biological_process	response to stimulus
csin103480	hypothetical protein; K13443 Niemann-Pick C2 protein	GO:0005488	molecular_function	binding
csin103480	hypothetical protein; K13443 Niemann-Pick C2 protein	GO:0005515	molecular_function	protein binding
csin103480	hypothetical protein; K13443 Niemann-Pick C2 protein	GO:0008289	molecular_function	lipid binding
csin103480	hypothetical protein; K13443 Niemann-Pick C2 protein	GO:0008152	biological_process	metabolic process
csin103480	hypothetical protein; K13443 Niemann-Pick C2 protein	GO:0044237	biological_process	cellular metabolic process
csin103480	hypothetical protein; K13443 Niemann-Pick C2 protein	GO:0044238	biological_process	primary metabolic process
csin103480	hypothetical protein; K13443 Niemann-Pick C2 protein	GO:0019222	biological_process	regulation of metabolic process
csin103480	hypothetical protein; K13443 Niemann-Pick C2 protein	GO:0009987	biological_process	cellular process
csin103480	hypothetical protein; K13443 Niemann-Pick C2 protein	GO:0051641	biological_process	cellular localization
csin103480	hypothetical protein; K13443 Niemann-Pick C2 protein	GO:0050794	biological_process	regulation of cellular process
csin103480	hypothetical protein; K13443 Niemann-Pick C2 protein	GO:0050896	biological_process	response to stimulus
csin103480	hypothetical protein; K13443 Niemann-Pick C2 protein	GO:0009607	biological_process	response to biotic stimulus
csin103480	hypothetical protein; K13443 Niemann-Pick C2 protein	GO:0051179	biological_process	localization
csin103480	hypothetical protein; K13443 Niemann-Pick C2 protein	GO:0033036	biological_process	macromolecule localization
csin103480	hypothetical protein; K13443 Niemann-Pick C2 protein	GO:0051234	biological_process	establishment of localization
csin103480	hypothetical protein; K13443 Niemann-Pick C2 protein	GO:0051704	biological_process	multi-organism process
csin103480	hypothetical protein; K13443 Niemann-Pick C2 protein	GO:0065007	biological_process	biological regulation
csin103480	hypothetical protein; K13443 Niemann-Pick C2 protein	GO:0050789	biological_process	regulation of biological process
csin103480	hypothetical protein; K13443 Niemann-Pick C2 protein	GO:0065008	biological_process	regulation of biological quality
csin103507	Tumor necrosis factor receptor superfamily member 16	GO:0005488	molecular_function	binding
csin103507	Tumor necrosis factor receptor superfamily member 16	GO:0005515	molecular_function	protein binding
csin103507	Tumor necrosis factor receptor superfamily member 16	GO:0060089	molecular_function	molecular transducer activity
csin103507	Tumor necrosis factor receptor superfamily member 16	GO:0004871	molecular_function	signal transducer activity
csin103507	Tumor necrosis factor receptor superfamily member 16	GO:0008152	biological_process	metabolic process
csin103507	Tumor necrosis factor receptor superfamily member 16	GO:0043170	biological_process	macromolecule metabolic process
csin103507	Tumor necrosis factor receptor superfamily member 16	GO:0019222	biological_process	regulation of metabolic process
csin103507	Tumor necrosis factor receptor superfamily member 16	GO:0008283	biological_process	cell proliferation
csin103507	Tumor necrosis factor receptor superfamily member 16	GO:0048144	biological_process	fibroblast proliferation
csin103507	Tumor necrosis factor receptor superfamily member 16	GO:0008284	biological_process	positive regulation of cell proliferation
csin103507	Tumor necrosis factor receptor superfamily member 16	GO:0042127	biological_process	regulation of cell proliferation
csin103507	Tumor necrosis factor receptor superfamily member 16	GO:0009987	biological_process	cellular process
csin103507	Tumor necrosis factor receptor superfamily member 16	GO:0007154	biological_process	cell communication
csin103507	Tumor necrosis factor receptor superfamily member 16	GO:0008219	biological_process	cell death
csin103507	Tumor necrosis factor receptor superfamily member 16	GO:0048869	biological_process	cellular developmental process
csin103507	Tumor necrosis factor receptor superfamily member 16	GO:0051716	biological_process	cellular response to stimulus
csin103507	Tumor necrosis factor receptor superfamily member 16	GO:0071841	biological_process	cellular component organization or biogenesis at cellular level
csin103507	Tumor necrosis factor receptor superfamily member 16	GO:0048522	biological_process	positive regulation of cellular process
csin103507	Tumor necrosis factor receptor superfamily member 16	GO:0048523	biological_process	negative regulation of cellular process
csin103507	Tumor necrosis factor receptor superfamily member 16	GO:0050794	biological_process	regulation of cellular process
csin103507	Tumor necrosis factor receptor superfamily member 16	GO:0016265	biological_process	death
csin103507	Tumor necrosis factor receptor superfamily member 16	GO:0023052	biological_process	signaling
csin103507	Tumor necrosis factor receptor superfamily member 16	GO:0023051	biological_process	regulation of signaling
csin103507	Tumor necrosis factor receptor superfamily member 16	GO:0032501	biological_process	multicellular organismal process
csin103507	Tumor necrosis factor receptor superfamily member 16	GO:0007275	biological_process	multicellular organismal development
csin103507	Tumor necrosis factor receptor superfamily member 16	GO:0042303	biological_process	molting cycle
csin103507	Tumor necrosis factor receptor superfamily member 16	GO:0051239	biological_process	regulation of multicellular organismal process
csin103507	Tumor necrosis factor receptor superfamily member 16	GO:0032502	biological_process	developmental process
csin103507	Tumor necrosis factor receptor superfamily member 16	GO:0009653	biological_process	anatomical structure morphogenesis
csin103507	Tumor necrosis factor receptor superfamily member 16	GO:0048856	biological_process	anatomical structure development
csin103507	Tumor necrosis factor receptor superfamily member 16	GO:0050793	biological_process	regulation of developmental process
csin103507	Tumor necrosis factor receptor superfamily member 16	GO:0040011	biological_process	locomotion
csin103507	Tumor necrosis factor receptor superfamily member 16	GO:0042330	biological_process	taxis
csin103507	Tumor necrosis factor receptor superfamily member 16	GO:0050896	biological_process	response to stimulus
csin103507	Tumor necrosis factor receptor superfamily member 16	GO:0009605	biological_process	response to external stimulus
csin103507	Tumor necrosis factor receptor superfamily member 16	GO:0009628	biological_process	response to abiotic stimulus
csin103507	Tumor necrosis factor receptor superfamily member 16	GO:0042221	biological_process	response to chemical stimulus
csin103507	Tumor necrosis factor receptor superfamily member 16	GO:0051606	biological_process	detection of stimulus
csin103507	Tumor necrosis factor receptor superfamily member 16	GO:0048583	biological_process	regulation of response to stimulus
csin103507	Tumor necrosis factor receptor superfamily member 16	GO:0065007	biological_process	biological regulation
csin103507	Tumor necrosis factor receptor superfamily member 16	GO:0050789	biological_process	regulation of biological process
csin103507	Tumor necrosis factor receptor superfamily member 16	GO:0071840	biological_process	cellular component organization or biogenesis
csin103507	Tumor necrosis factor receptor superfamily member 16	GO:0016043	biological_process	cellular component organization
csin103747	deoxycytidylate deaminase ; K01493 dCMP deaminase [EC:3.5.4.12]	GO:0003824	molecular_function	catalytic activity
csin103747	deoxycytidylate deaminase ; K01493 dCMP deaminase [EC:3.5.4.12]	GO:0016787	molecular_function	hydrolase activity
csin103747	deoxycytidylate deaminase ; K01493 dCMP deaminase [EC:3.5.4.12]	GO:0005488	molecular_function	binding
csin103747	deoxycytidylate deaminase ; K01493 dCMP deaminase [EC:3.5.4.12]	GO:0043167	molecular_function	ion binding
csin103788	hypothetical protein; K14648 poly(U)-specific endoribonuclease [EC:3.1.-.-]	GO:0003824	molecular_function	catalytic activity
csin103788	hypothetical protein; K14648 poly(U)-specific endoribonuclease [EC:3.1.-.-]	GO:0016787	molecular_function	hydrolase activity
csin103791	Metabotropic glutamate receptor 3	GO:0016247	molecular_function	channel regulator activity
csin103791	Metabotropic glutamate receptor 3	GO:0005246	molecular_function	calcium channel regulator activity
csin103791	Metabotropic glutamate receptor 3	GO:0060089	molecular_function	molecular transducer activity
csin103791	Metabotropic glutamate receptor 3	GO:0004871	molecular_function	signal transducer activity
csin103834	Protocadherin Fat 2	GO:0005488	molecular_function	binding
csin103834	Protocadherin Fat 2	GO:0043167	molecular_function	ion binding
csin103834	Protocadherin Fat 2	GO:0009987	biological_process	cellular process
csin103834	Protocadherin Fat 2	GO:0007155	biological_process	cell adhesion
csin103834	Protocadherin Fat 2	GO:0022610	biological_process	biological adhesion
csin103854	Protein quiver	GO:0005488	molecular_function	binding
csin103854	Protein quiver	GO:0008289	molecular_function	lipid binding
csin103854	Protein quiver	GO:0032501	biological_process	multicellular organismal process
csin103854	Protein quiver	GO:0030431	biological_process	sleep
csin103854	Protein quiver	GO:0051239	biological_process	regulation of multicellular organismal process
csin103854	Protein quiver	GO:0048511	biological_process	rhythmic process
csin103854	Protein quiver	GO:0007622	biological_process	rhythmic behavior
csin103854	Protein quiver	GO:0007623	biological_process	circadian rhythm
csin103854	Protein quiver	GO:0050896	biological_process	response to stimulus
csin103854	Protein quiver	GO:0007610	biological_process	behavior
csin103854	Protein quiver	GO:0048583	biological_process	regulation of response to stimulus
csin103854	Protein quiver	GO:0065007	biological_process	biological regulation
csin103854	Protein quiver	GO:0050789	biological_process	regulation of biological process
csin103998	ML1; MD2-like 1; K13443 Niemann-Pick C2 protein	GO:0005488	molecular_function	binding
csin103998	ML1; MD2-like 1; K13443 Niemann-Pick C2 protein	GO:0005515	molecular_function	protein binding
csin103998	ML1; MD2-like 1; K13443 Niemann-Pick C2 protein	GO:0008289	molecular_function	lipid binding
csin103998	ML1; MD2-like 1; K13443 Niemann-Pick C2 protein	GO:0008152	biological_process	metabolic process
csin103998	ML1; MD2-like 1; K13443 Niemann-Pick C2 protein	GO:0009058	biological_process	biosynthetic process
csin103998	ML1; MD2-like 1; K13443 Niemann-Pick C2 protein	GO:0042445	biological_process	hormone metabolic process
csin103998	ML1; MD2-like 1; K13443 Niemann-Pick C2 protein	GO:0044237	biological_process	cellular metabolic process
csin103998	ML1; MD2-like 1; K13443 Niemann-Pick C2 protein	GO:0044238	biological_process	primary metabolic process
csin103998	ML1; MD2-like 1; K13443 Niemann-Pick C2 protein	GO:0044281	biological_process	small molecule metabolic process
csin103998	ML1; MD2-like 1; K13443 Niemann-Pick C2 protein	GO:0009987	biological_process	cellular process
csin103998	ML1; MD2-like 1; K13443 Niemann-Pick C2 protein	GO:0032501	biological_process	multicellular organismal process
csin103998	ML1; MD2-like 1; K13443 Niemann-Pick C2 protein	GO:0007275	biological_process	multicellular organismal development
csin103998	ML1; MD2-like 1; K13443 Niemann-Pick C2 protein	GO:0032502	biological_process	developmental process
csin103998	ML1; MD2-like 1; K13443 Niemann-Pick C2 protein	GO:0051179	biological_process	localization
csin103998	ML1; MD2-like 1; K13443 Niemann-Pick C2 protein	GO:0033036	biological_process	macromolecule localization
csin103998	ML1; MD2-like 1; K13443 Niemann-Pick C2 protein	GO:0051234	biological_process	establishment of localization
csin103998	ML1; MD2-like 1; K13443 Niemann-Pick C2 protein	GO:0065007	biological_process	biological regulation
csin103998	ML1; MD2-like 1; K13443 Niemann-Pick C2 protein	GO:0065008	biological_process	regulation of biological quality
csin104043	Thioredoxin-related transmembrane protein 1	GO:0009987	biological_process	cellular process
csin104043	Thioredoxin-related transmembrane protein 1	GO:0019725	biological_process	cellular homeostasis
csin104043	Thioredoxin-related transmembrane protein 1	GO:0050794	biological_process	regulation of cellular process
csin104043	Thioredoxin-related transmembrane protein 1	GO:0065007	biological_process	biological regulation
csin104043	Thioredoxin-related transmembrane protein 1	GO:0050789	biological_process	regulation of biological process
csin104043	Thioredoxin-related transmembrane protein 1	GO:0065008	biological_process	regulation of biological quality
csin104298	SPARC	GO:0005488	molecular_function	binding
csin104298	SPARC	GO:0043167	molecular_function	ion binding
csin104298	SPARC	GO:0000003	biological_process	reproduction
csin104298	SPARC	GO:0009987	biological_process	cellular process
csin104298	SPARC	GO:0051716	biological_process	cellular response to stimulus
csin104298	SPARC	GO:0050794	biological_process	regulation of cellular process
csin104298	SPARC	GO:0023052	biological_process	signaling
csin104298	SPARC	GO:0032501	biological_process	multicellular organismal process
csin104298	SPARC	GO:0007275	biological_process	multicellular organismal development
csin104298	SPARC	GO:0035264	biological_process	multicellular organism growth
csin104298	SPARC	GO:0051239	biological_process	regulation of multicellular organismal process
csin104298	SPARC	GO:0032502	biological_process	developmental process
csin104298	SPARC	GO:0040007	biological_process	growth
csin104298	SPARC	GO:0040008	biological_process	regulation of growth
csin104298	SPARC	GO:0050896	biological_process	response to stimulus
csin104298	SPARC	GO:0065007	biological_process	biological regulation
csin104298	SPARC	GO:0050789	biological_process	regulation of biological process
csin104340	PC3-like endoprotease variant A	GO:0003824	molecular_function	catalytic activity
csin104340	PC3-like endoprotease variant A	GO:0016787	molecular_function	hydrolase activity
csin104340	PC3-like endoprotease variant A	GO:0008152	biological_process	metabolic process
csin104340	PC3-like endoprotease variant A	GO:0043170	biological_process	macromolecule metabolic process
csin104340	PC3-like endoprotease variant A	GO:0044238	biological_process	primary metabolic process
csin104344	carbonic anhydrase ; K01672 carbonic anhydrase [EC:4.2.1.1]	GO:0003824	molecular_function	catalytic activity
csin104344	carbonic anhydrase ; K01672 carbonic anhydrase [EC:4.2.1.1]	GO:0016829	molecular_function	lyase activity
csin104344	carbonic anhydrase ; K01672 carbonic anhydrase [EC:4.2.1.1]	GO:0005488	molecular_function	binding
csin104344	carbonic anhydrase ; K01672 carbonic anhydrase [EC:4.2.1.1]	GO:0043167	molecular_function	ion binding
csin104344	carbonic anhydrase ; K01672 carbonic anhydrase [EC:4.2.1.1]	GO:0008152	biological_process	metabolic process
csin104344	carbonic anhydrase ; K01672 carbonic anhydrase [EC:4.2.1.1]	GO:0044237	biological_process	cellular metabolic process
csin104344	carbonic anhydrase ; K01672 carbonic anhydrase [EC:4.2.1.1]	GO:0044281	biological_process	small molecule metabolic process
csin104344	carbonic anhydrase ; K01672 carbonic anhydrase [EC:4.2.1.1]	GO:0009987	biological_process	cellular process
csin104366	Histone H3, embryonic	GO:0005488	molecular_function	binding
csin104366	Histone H3, embryonic	GO:0003676	molecular_function	nucleic acid binding
csin104366	Histone H3, embryonic	GO:0009987	biological_process	cellular process
csin104366	Histone H3, embryonic	GO:0071103	biological_process	DNA conformation change
csin104366	Histone H3, embryonic	GO:0071841	biological_process	cellular component organization or biogenesis at cellular level
csin104366	Histone H3, embryonic	GO:0071840	biological_process	cellular component organization or biogenesis
csin104366	Histone H3, embryonic	GO:0016043	biological_process	cellular component organization
csin104366	Histone H3, embryonic	GO:0044085	biological_process	cellular component biogenesis
csin104398	Retrovirus-related Pol polyprotein from type-1 retrotransposable element R2	GO:0003824	molecular_function	catalytic activity
csin104398	Retrovirus-related Pol polyprotein from type-1 retrotransposable element R2	GO:0016740	molecular_function	transferase activity
csin104398	Retrovirus-related Pol polyprotein from type-1 retrotransposable element R2	GO:0005488	molecular_function	binding
csin104398	Retrovirus-related Pol polyprotein from type-1 retrotransposable element R2	GO:0003676	molecular_function	nucleic acid binding
csin104398	Retrovirus-related Pol polyprotein from type-1 retrotransposable element R2	GO:0043167	molecular_function	ion binding
csin104398	Retrovirus-related Pol polyprotein from type-1 retrotransposable element R2	GO:0008152	biological_process	metabolic process
csin104398	Retrovirus-related Pol polyprotein from type-1 retrotransposable element R2	GO:0006807	biological_process	nitrogen compound metabolic process
csin104398	Retrovirus-related Pol polyprotein from type-1 retrotransposable element R2	GO:0009058	biological_process	biosynthetic process
csin104398	Retrovirus-related Pol polyprotein from type-1 retrotransposable element R2	GO:0043170	biological_process	macromolecule metabolic process
csin104398	Retrovirus-related Pol polyprotein from type-1 retrotransposable element R2	GO:0044237	biological_process	cellular metabolic process
csin104398	Retrovirus-related Pol polyprotein from type-1 retrotransposable element R2	GO:0044238	biological_process	primary metabolic process
csin104398	Retrovirus-related Pol polyprotein from type-1 retrotransposable element R2	GO:0009987	biological_process	cellular process
csin104401	Cathepsin B-like cysteine proteinase	GO:0003824	molecular_function	catalytic activity
csin104401	Cathepsin B-like cysteine proteinase	GO:0016787	molecular_function	hydrolase activity
csin104401	Cathepsin B-like cysteine proteinase	GO:0008152	biological_process	metabolic process
csin104401	Cathepsin B-like cysteine proteinase	GO:0043170	biological_process	macromolecule metabolic process
csin104401	Cathepsin B-like cysteine proteinase	GO:0044238	biological_process	primary metabolic process
csin104401	Cathepsin B-like cysteine proteinase	GO:0019222	biological_process	regulation of metabolic process
csin104401	Cathepsin B-like cysteine proteinase	GO:0065007	biological_process	biological regulation
csin104401	Cathepsin B-like cysteine proteinase	GO:0050789	biological_process	regulation of biological process
csin104401	Cathepsin B-like cysteine proteinase	GO:0065009	biological_process	regulation of molecular function
csin104630	Nucleobindin-2	GO:0005488	molecular_function	binding
csin104630	Nucleobindin-2	GO:0043167	molecular_function	ion binding
csin104792	Voltage-gated potassium channel subunit beta-2	GO:0003824	molecular_function	catalytic activity
csin104792	Voltage-gated potassium channel subunit beta-2	GO:0016491	molecular_function	oxidoreductase activity
csin104792	Voltage-gated potassium channel subunit beta-2	GO:0005215	molecular_function	transporter activity
csin104792	Voltage-gated potassium channel subunit beta-2	GO:0022857	molecular_function	transmembrane transporter activity
csin104792	Voltage-gated potassium channel subunit beta-2	GO:0022892	molecular_function	substrate-specific transporter activity
csin104792	Voltage-gated potassium channel subunit beta-2	GO:0009987	biological_process	cellular process
csin104792	Voltage-gated potassium channel subunit beta-2	GO:0055085	biological_process	transmembrane transport
csin104792	Voltage-gated potassium channel subunit beta-2	GO:0051179	biological_process	localization
csin104792	Voltage-gated potassium channel subunit beta-2	GO:0051234	biological_process	establishment of localization
csin104867	hypothetical protein	GO:0009987	biological_process	cellular process
csin104867	hypothetical protein	GO:0034330	biological_process	cell junction organization
csin104867	hypothetical protein	GO:0071841	biological_process	cellular component organization or biogenesis at cellular level
csin104867	hypothetical protein	GO:0032501	biological_process	multicellular organismal process
csin104867	hypothetical protein	GO:0007275	biological_process	multicellular organismal development
csin104867	hypothetical protein	GO:0032502	biological_process	developmental process
csin104867	hypothetical protein	GO:0048856	biological_process	anatomical structure development
csin104867	hypothetical protein	GO:0065007	biological_process	biological regulation
csin104867	hypothetical protein	GO:0065008	biological_process	regulation of biological quality
csin104867	hypothetical protein	GO:0071840	biological_process	cellular component organization or biogenesis
csin104867	hypothetical protein	GO:0016043	biological_process	cellular component organization
csin104867	hypothetical protein	GO:0044085	biological_process	cellular component biogenesis
csin105055	multiple inositol polyphosphate phosphatase-related ; K03103 multiple inosit	GO:0003824	molecular_function	catalytic activity
csin105055	multiple inositol polyphosphate phosphatase-related ; K03103 multiple inosit	GO:0016787	molecular_function	hydrolase activity
csin105079	cystatin B ; K13907 cystatin-A/B	GO:0030234	molecular_function	enzyme regulator activity
csin105079	cystatin B ; K13907 cystatin-A/B	GO:0004857	molecular_function	enzyme inhibitor activity
csin105079	cystatin B ; K13907 cystatin-A/B	GO:0061134	molecular_function	peptidase regulator activity
csin105079	cystatin B ; K13907 cystatin-A/B	GO:0008152	biological_process	metabolic process
csin105079	cystatin B ; K13907 cystatin-A/B	GO:0019222	biological_process	regulation of metabolic process
csin105079	cystatin B ; K13907 cystatin-A/B	GO:0065007	biological_process	biological regulation
csin105079	cystatin B ; K13907 cystatin-A/B	GO:0050789	biological_process	regulation of biological process
csin105079	cystatin B ; K13907 cystatin-A/B	GO:0065009	biological_process	regulation of molecular function
csin105092	camp-specific 35-cyclic phosphodiesterase ; K01120 3',5'-cyclic-nucleotide p	GO:0003824	molecular_function	catalytic activity
csin105092	camp-specific 35-cyclic phosphodiesterase ; K01120 3',5'-cyclic-nucleotide p	GO:0016787	molecular_function	hydrolase activity
csin105092	camp-specific 35-cyclic phosphodiesterase ; K01120 3',5'-cyclic-nucleotide p	GO:0005488	molecular_function	binding
csin105092	camp-specific 35-cyclic phosphodiesterase ; K01120 3',5'-cyclic-nucleotide p	GO:0043167	molecular_function	ion binding
csin105092	camp-specific 35-cyclic phosphodiesterase ; K01120 3',5'-cyclic-nucleotide p	GO:0008152	biological_process	metabolic process
csin105092	camp-specific 35-cyclic phosphodiesterase ; K01120 3',5'-cyclic-nucleotide p	GO:0006807	biological_process	nitrogen compound metabolic process
csin105092	camp-specific 35-cyclic phosphodiesterase ; K01120 3',5'-cyclic-nucleotide p	GO:0009056	biological_process	catabolic process
csin105092	camp-specific 35-cyclic phosphodiesterase ; K01120 3',5'-cyclic-nucleotide p	GO:0044237	biological_process	cellular metabolic process
csin105092	camp-specific 35-cyclic phosphodiesterase ; K01120 3',5'-cyclic-nucleotide p	GO:0044238	biological_process	primary metabolic process
csin105092	camp-specific 35-cyclic phosphodiesterase ; K01120 3',5'-cyclic-nucleotide p	GO:0044281	biological_process	small molecule metabolic process
csin105092	camp-specific 35-cyclic phosphodiesterase ; K01120 3',5'-cyclic-nucleotide p	GO:0009987	biological_process	cellular process
csin105092	camp-specific 35-cyclic phosphodiesterase ; K01120 3',5'-cyclic-nucleotide p	GO:0051716	biological_process	cellular response to stimulus
csin105092	camp-specific 35-cyclic phosphodiesterase ; K01120 3',5'-cyclic-nucleotide p	GO:0050794	biological_process	regulation of cellular process
csin105092	camp-specific 35-cyclic phosphodiesterase ; K01120 3',5'-cyclic-nucleotide p	GO:0023052	biological_process	signaling
csin105092	camp-specific 35-cyclic phosphodiesterase ; K01120 3',5'-cyclic-nucleotide p	GO:0032501	biological_process	multicellular organismal process
csin105092	camp-specific 35-cyclic phosphodiesterase ; K01120 3',5'-cyclic-nucleotide p	GO:0003008	biological_process	system process
csin105092	camp-specific 35-cyclic phosphodiesterase ; K01120 3',5'-cyclic-nucleotide p	GO:0050896	biological_process	response to stimulus
csin105092	camp-specific 35-cyclic phosphodiesterase ; K01120 3',5'-cyclic-nucleotide p	GO:0065007	biological_process	biological regulation
csin105092	camp-specific 35-cyclic phosphodiesterase ; K01120 3',5'-cyclic-nucleotide p	GO:0050789	biological_process	regulation of biological process
csin105192	UDP-GlcNAc:betaGal beta-1,3-N-acetylglucosaminyltransferase 5	GO:0003824	molecular_function	catalytic activity
csin105192	UDP-GlcNAc:betaGal beta-1,3-N-acetylglucosaminyltransferase 5	GO:0016740	molecular_function	transferase activity
csin105192	UDP-GlcNAc:betaGal beta-1,3-N-acetylglucosaminyltransferase 5	GO:0008152	biological_process	metabolic process
csin105192	UDP-GlcNAc:betaGal beta-1,3-N-acetylglucosaminyltransferase 5	GO:0009058	biological_process	biosynthetic process
csin105192	UDP-GlcNAc:betaGal beta-1,3-N-acetylglucosaminyltransferase 5	GO:0043170	biological_process	macromolecule metabolic process
csin105192	UDP-GlcNAc:betaGal beta-1,3-N-acetylglucosaminyltransferase 5	GO:0044237	biological_process	cellular metabolic process
csin105192	UDP-GlcNAc:betaGal beta-1,3-N-acetylglucosaminyltransferase 5	GO:0044238	biological_process	primary metabolic process
csin105192	UDP-GlcNAc:betaGal beta-1,3-N-acetylglucosaminyltransferase 5	GO:0009987	biological_process	cellular process
csin105287	Chymosin	GO:0003824	molecular_function	catalytic activity
csin105287	Chymosin	GO:0016787	molecular_function	hydrolase activity
csin105287	Chymosin	GO:0008152	biological_process	metabolic process
csin105287	Chymosin	GO:0043170	biological_process	macromolecule metabolic process
csin105287	Chymosin	GO:0044238	biological_process	primary metabolic process
csin105287	Chymosin	GO:0032501	biological_process	multicellular organismal process
csin105287	Chymosin	GO:0007586	biological_process	digestion
csin105691	Zinc finger and BTB domain-containing protein 49	GO:0005488	molecular_function	binding
csin105691	Zinc finger and BTB domain-containing protein 49	GO:0003676	molecular_function	nucleic acid binding
csin105691	Zinc finger and BTB domain-containing protein 49	GO:0043167	molecular_function	ion binding
csin105701	Fasciclin-1	GO:0000003	biological_process	reproduction
csin105701	Fasciclin-1	GO:0019953	biological_process	sexual reproduction
csin105701	Fasciclin-1	GO:0032504	biological_process	multicellular organism reproduction
csin105701	Fasciclin-1	GO:0022414	biological_process	reproductive process
csin105701	Fasciclin-1	GO:0032501	biological_process	multicellular organismal process
csin105701	Fasciclin-1	GO:0007275	biological_process	multicellular organismal development
csin105701	Fasciclin-1	GO:0032502	biological_process	developmental process
csin105701	Fasciclin-1	GO:0040007	biological_process	growth
csin105946	Extracellular superoxide dismutase [Cu-Zn]	GO:0003824	molecular_function	catalytic activity
csin105946	Extracellular superoxide dismutase [Cu-Zn]	GO:0016491	molecular_function	oxidoreductase activity
csin105946	Extracellular superoxide dismutase [Cu-Zn]	GO:0005488	molecular_function	binding
csin105946	Extracellular superoxide dismutase [Cu-Zn]	GO:0043167	molecular_function	ion binding
csin105946	Extracellular superoxide dismutase [Cu-Zn]	GO:0016209	molecular_function	antioxidant activity
csin105946	Extracellular superoxide dismutase [Cu-Zn]	GO:0008152	biological_process	metabolic process
csin105946	Extracellular superoxide dismutase [Cu-Zn]	GO:0044237	biological_process	cellular metabolic process
csin105946	Extracellular superoxide dismutase [Cu-Zn]	GO:0055114	biological_process	oxidation-reduction process
csin105946	Extracellular superoxide dismutase [Cu-Zn]	GO:0009987	biological_process	cellular process
csin105946	Extracellular superoxide dismutase [Cu-Zn]	GO:0051179	biological_process	localization
csin105946	Extracellular superoxide dismutase [Cu-Zn]	GO:0051234	biological_process	establishment of localization
csin106016	NAPSA; napsin A aspartic peptidase; K08565 napsin-A [EC:3.4.23.-]	GO:0003824	molecular_function	catalytic activity
csin106016	NAPSA; napsin A aspartic peptidase; K08565 napsin-A [EC:3.4.23.-]	GO:0016787	molecular_function	hydrolase activity
csin106016	NAPSA; napsin A aspartic peptidase; K08565 napsin-A [EC:3.4.23.-]	GO:0008152	biological_process	metabolic process
csin106016	NAPSA; napsin A aspartic peptidase; K08565 napsin-A [EC:3.4.23.-]	GO:0043170	biological_process	macromolecule metabolic process
csin106016	NAPSA; napsin A aspartic peptidase; K08565 napsin-A [EC:3.4.23.-]	GO:0044238	biological_process	primary metabolic process
csin106075	Venom allergen 5	GO:0005488	molecular_function	binding
csin106075	Venom allergen 5	GO:0005515	molecular_function	protein binding
csin107478	expressed hypothetical protein ; K01242 NAD+ nucleosidase [EC:3.2.2.5]	GO:0003824	molecular_function	catalytic activity
csin107478	expressed hypothetical protein ; K01242 NAD+ nucleosidase [EC:3.2.2.5]	GO:0016787	molecular_function	hydrolase activity
csin107478	expressed hypothetical protein ; K01242 NAD+ nucleosidase [EC:3.2.2.5]	GO:0016829	molecular_function	lyase activity
csin107478	expressed hypothetical protein ; K01242 NAD+ nucleosidase [EC:3.2.2.5]	GO:0005488	molecular_function	binding
csin107478	expressed hypothetical protein ; K01242 NAD+ nucleosidase [EC:3.2.2.5]	GO:0060089	molecular_function	molecular transducer activity
csin107478	expressed hypothetical protein ; K01242 NAD+ nucleosidase [EC:3.2.2.5]	GO:0004871	molecular_function	signal transducer activity
csin107478	expressed hypothetical protein ; K01242 NAD+ nucleosidase [EC:3.2.2.5]	GO:0000003	biological_process	reproduction
csin107478	expressed hypothetical protein ; K01242 NAD+ nucleosidase [EC:3.2.2.5]	GO:0022414	biological_process	reproductive process
csin107478	expressed hypothetical protein ; K01242 NAD+ nucleosidase [EC:3.2.2.5]	GO:0002376	biological_process	immune system process
csin107478	expressed hypothetical protein ; K01242 NAD+ nucleosidase [EC:3.2.2.5]	GO:0002253	biological_process	activation of immune response
csin107478	expressed hypothetical protein ; K01242 NAD+ nucleosidase [EC:3.2.2.5]	GO:0006955	biological_process	immune response
csin107478	expressed hypothetical protein ; K01242 NAD+ nucleosidase [EC:3.2.2.5]	GO:0045321	biological_process	leukocyte activation
csin107478	expressed hypothetical protein ; K01242 NAD+ nucleosidase [EC:3.2.2.5]	GO:0002682	biological_process	regulation of immune system process
csin107478	expressed hypothetical protein ; K01242 NAD+ nucleosidase [EC:3.2.2.5]	GO:0008152	biological_process	metabolic process
csin107478	expressed hypothetical protein ; K01242 NAD+ nucleosidase [EC:3.2.2.5]	GO:0006807	biological_process	nitrogen compound metabolic process
csin107478	expressed hypothetical protein ; K01242 NAD+ nucleosidase [EC:3.2.2.5]	GO:0009058	biological_process	biosynthetic process
csin107478	expressed hypothetical protein ; K01242 NAD+ nucleosidase [EC:3.2.2.5]	GO:0043170	biological_process	macromolecule metabolic process
csin107478	expressed hypothetical protein ; K01242 NAD+ nucleosidase [EC:3.2.2.5]	GO:0044237	biological_process	cellular metabolic process
csin107478	expressed hypothetical protein ; K01242 NAD+ nucleosidase [EC:3.2.2.5]	GO:0044238	biological_process	primary metabolic process
csin107478	expressed hypothetical protein ; K01242 NAD+ nucleosidase [EC:3.2.2.5]	GO:0009892	biological_process	negative regulation of metabolic process
csin107478	expressed hypothetical protein ; K01242 NAD+ nucleosidase [EC:3.2.2.5]	GO:0009893	biological_process	positive regulation of metabolic process
csin107478	expressed hypothetical protein ; K01242 NAD+ nucleosidase [EC:3.2.2.5]	GO:0019222	biological_process	regulation of metabolic process
csin107478	expressed hypothetical protein ; K01242 NAD+ nucleosidase [EC:3.2.2.5]	GO:0008283	biological_process	cell proliferation
csin107478	expressed hypothetical protein ; K01242 NAD+ nucleosidase [EC:3.2.2.5]	GO:0070661	biological_process	leukocyte proliferation
csin107478	expressed hypothetical protein ; K01242 NAD+ nucleosidase [EC:3.2.2.5]	GO:0008284	biological_process	positive regulation of cell proliferation
csin107478	expressed hypothetical protein ; K01242 NAD+ nucleosidase [EC:3.2.2.5]	GO:0042127	biological_process	regulation of cell proliferation
csin107478	expressed hypothetical protein ; K01242 NAD+ nucleosidase [EC:3.2.2.5]	GO:0009987	biological_process	cellular process
csin107478	expressed hypothetical protein ; K01242 NAD+ nucleosidase [EC:3.2.2.5]	GO:0001775	biological_process	cell activation
csin107478	expressed hypothetical protein ; K01242 NAD+ nucleosidase [EC:3.2.2.5]	GO:0003001	biological_process	generation of a signal involved in cell-cell signaling
csin107478	expressed hypothetical protein ; K01242 NAD+ nucleosidase [EC:3.2.2.5]	GO:0007154	biological_process	cell communication
csin107478	expressed hypothetical protein ; K01242 NAD+ nucleosidase [EC:3.2.2.5]	GO:0008219	biological_process	cell death
csin107478	expressed hypothetical protein ; K01242 NAD+ nucleosidase [EC:3.2.2.5]	GO:0016049	biological_process	cell growth
csin107478	expressed hypothetical protein ; K01242 NAD+ nucleosidase [EC:3.2.2.5]	GO:0019725	biological_process	cellular homeostasis
csin107478	expressed hypothetical protein ; K01242 NAD+ nucleosidase [EC:3.2.2.5]	GO:0032940	biological_process	secretion by cell
csin107478	expressed hypothetical protein ; K01242 NAD+ nucleosidase [EC:3.2.2.5]	GO:0051641	biological_process	cellular localization
csin107478	expressed hypothetical protein ; K01242 NAD+ nucleosidase [EC:3.2.2.5]	GO:0051716	biological_process	cellular response to stimulus
csin107478	expressed hypothetical protein ; K01242 NAD+ nucleosidase [EC:3.2.2.5]	GO:0048522	biological_process	positive regulation of cellular process
csin107478	expressed hypothetical protein ; K01242 NAD+ nucleosidase [EC:3.2.2.5]	GO:0048523	biological_process	negative regulation of cellular process
csin107478	expressed hypothetical protein ; K01242 NAD+ nucleosidase [EC:3.2.2.5]	GO:0050794	biological_process	regulation of cellular process
csin107478	expressed hypothetical protein ; K01242 NAD+ nucleosidase [EC:3.2.2.5]	GO:0016265	biological_process	death
csin107478	expressed hypothetical protein ; K01242 NAD+ nucleosidase [EC:3.2.2.5]	GO:0023052	biological_process	signaling
csin107478	expressed hypothetical protein ; K01242 NAD+ nucleosidase [EC:3.2.2.5]	GO:0035637	biological_process	multicellular organismal signaling
csin107478	expressed hypothetical protein ; K01242 NAD+ nucleosidase [EC:3.2.2.5]	GO:0023051	biological_process	regulation of signaling
csin107478	expressed hypothetical protein ; K01242 NAD+ nucleosidase [EC:3.2.2.5]	GO:0032501	biological_process	multicellular organismal process
csin107478	expressed hypothetical protein ; K01242 NAD+ nucleosidase [EC:3.2.2.5]	GO:0003008	biological_process	system process
csin107478	expressed hypothetical protein ; K01242 NAD+ nucleosidase [EC:3.2.2.5]	GO:0048771	biological_process	tissue remodeling
csin107478	expressed hypothetical protein ; K01242 NAD+ nucleosidase [EC:3.2.2.5]	GO:0048871	biological_process	multicellular organismal homeostasis
csin107478	expressed hypothetical protein ; K01242 NAD+ nucleosidase [EC:3.2.2.5]	GO:0051239	biological_process	regulation of multicellular organismal process
csin107478	expressed hypothetical protein ; K01242 NAD+ nucleosidase [EC:3.2.2.5]	GO:0040007	biological_process	growth
csin107478	expressed hypothetical protein ; K01242 NAD+ nucleosidase [EC:3.2.2.5]	GO:0040008	biological_process	regulation of growth
csin107478	expressed hypothetical protein ; K01242 NAD+ nucleosidase [EC:3.2.2.5]	GO:0050896	biological_process	response to stimulus
csin107478	expressed hypothetical protein ; K01242 NAD+ nucleosidase [EC:3.2.2.5]	GO:0006950	biological_process	response to stress
csin107478	expressed hypothetical protein ; K01242 NAD+ nucleosidase [EC:3.2.2.5]	GO:0009605	biological_process	response to external stimulus
csin107478	expressed hypothetical protein ; K01242 NAD+ nucleosidase [EC:3.2.2.5]	GO:0009719	biological_process	response to endogenous stimulus
csin107478	expressed hypothetical protein ; K01242 NAD+ nucleosidase [EC:3.2.2.5]	GO:0042221	biological_process	response to chemical stimulus
csin107478	expressed hypothetical protein ; K01242 NAD+ nucleosidase [EC:3.2.2.5]	GO:0048583	biological_process	regulation of response to stimulus
csin107478	expressed hypothetical protein ; K01242 NAD+ nucleosidase [EC:3.2.2.5]	GO:0051179	biological_process	localization
csin107478	expressed hypothetical protein ; K01242 NAD+ nucleosidase [EC:3.2.2.5]	GO:0032879	biological_process	regulation of localization
csin107478	expressed hypothetical protein ; K01242 NAD+ nucleosidase [EC:3.2.2.5]	GO:0051234	biological_process	establishment of localization
csin107478	expressed hypothetical protein ; K01242 NAD+ nucleosidase [EC:3.2.2.5]	GO:0051704	biological_process	multi-organism process
csin107478	expressed hypothetical protein ; K01242 NAD+ nucleosidase [EC:3.2.2.5]	GO:0065007	biological_process	biological regulation
csin107478	expressed hypothetical protein ; K01242 NAD+ nucleosidase [EC:3.2.2.5]	GO:0050789	biological_process	regulation of biological process
csin107478	expressed hypothetical protein ; K01242 NAD+ nucleosidase [EC:3.2.2.5]	GO:0065008	biological_process	regulation of biological quality
csin107478	expressed hypothetical protein ; K01242 NAD+ nucleosidase [EC:3.2.2.5]	GO:0071840	biological_process	cellular component organization or biogenesis
csin107478	expressed hypothetical protein ; K01242 NAD+ nucleosidase [EC:3.2.2.5]	GO:0016043	biological_process	cellular component organization
csin107588	Tubulin alpha-3 chain	GO:0003824	molecular_function	catalytic activity
csin107588	Tubulin alpha-3 chain	GO:0016787	molecular_function	hydrolase activity
csin107588	Tubulin alpha-3 chain	GO:0005198	molecular_function	structural molecule activity
csin107588	Tubulin alpha-3 chain	GO:0005488	molecular_function	binding
csin107588	Tubulin alpha-3 chain	GO:0000166	molecular_function	nucleotide binding
csin107588	Tubulin alpha-3 chain	GO:0009987	biological_process	cellular process
csin107588	Tubulin alpha-3 chain	GO:0007017	biological_process	microtubule-based process
csin107588	Tubulin alpha-3 chain	GO:0071841	biological_process	cellular component organization or biogenesis at cellular level
csin107588	Tubulin alpha-3 chain	GO:0071840	biological_process	cellular component organization or biogenesis
csin107588	Tubulin alpha-3 chain	GO:0016043	biological_process	cellular component organization
csin107588	Tubulin alpha-3 chain	GO:0044085	biological_process	cellular component biogenesis
csin107742	tubulin subunit delta ; K10390 tubulin delta	GO:0003824	molecular_function	catalytic activity
csin107742	tubulin subunit delta ; K10390 tubulin delta	GO:0016787	molecular_function	hydrolase activity
csin107742	tubulin subunit delta ; K10390 tubulin delta	GO:0005198	molecular_function	structural molecule activity
csin107742	tubulin subunit delta ; K10390 tubulin delta	GO:0005488	molecular_function	binding
csin107742	tubulin subunit delta ; K10390 tubulin delta	GO:0000166	molecular_function	nucleotide binding
csin107742	tubulin subunit delta ; K10390 tubulin delta	GO:0008152	biological_process	metabolic process
csin107742	tubulin subunit delta ; K10390 tubulin delta	GO:0006807	biological_process	nitrogen compound metabolic process
csin107742	tubulin subunit delta ; K10390 tubulin delta	GO:0009056	biological_process	catabolic process
csin107742	tubulin subunit delta ; K10390 tubulin delta	GO:0044237	biological_process	cellular metabolic process
csin107742	tubulin subunit delta ; K10390 tubulin delta	GO:0044238	biological_process	primary metabolic process
csin107742	tubulin subunit delta ; K10390 tubulin delta	GO:0044281	biological_process	small molecule metabolic process
csin107742	tubulin subunit delta ; K10390 tubulin delta	GO:0009987	biological_process	cellular process
csin107742	tubulin subunit delta ; K10390 tubulin delta	GO:0007017	biological_process	microtubule-based process
csin107742	tubulin subunit delta ; K10390 tubulin delta	GO:0071841	biological_process	cellular component organization or biogenesis at cellular level
csin107742	tubulin subunit delta ; K10390 tubulin delta	GO:0071840	biological_process	cellular component organization or biogenesis
csin107742	tubulin subunit delta ; K10390 tubulin delta	GO:0016043	biological_process	cellular component organization
csin107742	tubulin subunit delta ; K10390 tubulin delta	GO:0044085	biological_process	cellular component biogenesis
csin107773	expressed hypothetical protein ; K13443 Niemann-Pick C2 protein	GO:0005488	molecular_function	binding
csin107773	expressed hypothetical protein ; K13443 Niemann-Pick C2 protein	GO:0005515	molecular_function	protein binding
csin107773	expressed hypothetical protein ; K13443 Niemann-Pick C2 protein	GO:0008289	molecular_function	lipid binding
csin107773	expressed hypothetical protein ; K13443 Niemann-Pick C2 protein	GO:0008152	biological_process	metabolic process
csin107773	expressed hypothetical protein ; K13443 Niemann-Pick C2 protein	GO:0009058	biological_process	biosynthetic process
csin107773	expressed hypothetical protein ; K13443 Niemann-Pick C2 protein	GO:0042445	biological_process	hormone metabolic process
csin107773	expressed hypothetical protein ; K13443 Niemann-Pick C2 protein	GO:0044237	biological_process	cellular metabolic process
csin107773	expressed hypothetical protein ; K13443 Niemann-Pick C2 protein	GO:0044238	biological_process	primary metabolic process
csin107773	expressed hypothetical protein ; K13443 Niemann-Pick C2 protein	GO:0044281	biological_process	small molecule metabolic process
csin107773	expressed hypothetical protein ; K13443 Niemann-Pick C2 protein	GO:0009987	biological_process	cellular process
csin107773	expressed hypothetical protein ; K13443 Niemann-Pick C2 protein	GO:0032501	biological_process	multicellular organismal process
csin107773	expressed hypothetical protein ; K13443 Niemann-Pick C2 protein	GO:0007275	biological_process	multicellular organismal development
csin107773	expressed hypothetical protein ; K13443 Niemann-Pick C2 protein	GO:0032502	biological_process	developmental process
csin107773	expressed hypothetical protein ; K13443 Niemann-Pick C2 protein	GO:0051179	biological_process	localization
csin107773	expressed hypothetical protein ; K13443 Niemann-Pick C2 protein	GO:0033036	biological_process	macromolecule localization
csin107773	expressed hypothetical protein ; K13443 Niemann-Pick C2 protein	GO:0051234	biological_process	establishment of localization
csin107773	expressed hypothetical protein ; K13443 Niemann-Pick C2 protein	GO:0065007	biological_process	biological regulation
csin107773	expressed hypothetical protein ; K13443 Niemann-Pick C2 protein	GO:0065008	biological_process	regulation of biological quality
csin107774	expressed hypothetical protein ; K13443 Niemann-Pick C2 protein	GO:0005488	molecular_function	binding
csin107774	expressed hypothetical protein ; K13443 Niemann-Pick C2 protein	GO:0005515	molecular_function	protein binding
csin107774	expressed hypothetical protein ; K13443 Niemann-Pick C2 protein	GO:0008289	molecular_function	lipid binding
csin107774	expressed hypothetical protein ; K13443 Niemann-Pick C2 protein	GO:0008152	biological_process	metabolic process
csin107774	expressed hypothetical protein ; K13443 Niemann-Pick C2 protein	GO:0044237	biological_process	cellular metabolic process
csin107774	expressed hypothetical protein ; K13443 Niemann-Pick C2 protein	GO:0044238	biological_process	primary metabolic process
csin107774	expressed hypothetical protein ; K13443 Niemann-Pick C2 protein	GO:0019222	biological_process	regulation of metabolic process
csin107774	expressed hypothetical protein ; K13443 Niemann-Pick C2 protein	GO:0009987	biological_process	cellular process
csin107774	expressed hypothetical protein ; K13443 Niemann-Pick C2 protein	GO:0051641	biological_process	cellular localization
csin107774	expressed hypothetical protein ; K13443 Niemann-Pick C2 protein	GO:0050794	biological_process	regulation of cellular process
csin107774	expressed hypothetical protein ; K13443 Niemann-Pick C2 protein	GO:0050896	biological_process	response to stimulus
csin107774	expressed hypothetical protein ; K13443 Niemann-Pick C2 protein	GO:0009607	biological_process	response to biotic stimulus
csin107774	expressed hypothetical protein ; K13443 Niemann-Pick C2 protein	GO:0051179	biological_process	localization
csin107774	expressed hypothetical protein ; K13443 Niemann-Pick C2 protein	GO:0033036	biological_process	macromolecule localization
csin107774	expressed hypothetical protein ; K13443 Niemann-Pick C2 protein	GO:0051234	biological_process	establishment of localization
csin107774	expressed hypothetical protein ; K13443 Niemann-Pick C2 protein	GO:0051704	biological_process	multi-organism process
csin107774	expressed hypothetical protein ; K13443 Niemann-Pick C2 protein	GO:0065007	biological_process	biological regulation
csin107774	expressed hypothetical protein ; K13443 Niemann-Pick C2 protein	GO:0050789	biological_process	regulation of biological process
csin107774	expressed hypothetical protein ; K13443 Niemann-Pick C2 protein	GO:0065008	biological_process	regulation of biological quality
csin107775	expressed hypothetical protein ; K13443 Niemann-Pick C2 protein	GO:0005488	molecular_function	binding
csin107775	expressed hypothetical protein ; K13443 Niemann-Pick C2 protein	GO:0005515	molecular_function	protein binding
csin107775	expressed hypothetical protein ; K13443 Niemann-Pick C2 protein	GO:0008289	molecular_function	lipid binding
csin107775	expressed hypothetical protein ; K13443 Niemann-Pick C2 protein	GO:0008152	biological_process	metabolic process
csin107775	expressed hypothetical protein ; K13443 Niemann-Pick C2 protein	GO:0009058	biological_process	biosynthetic process
csin107775	expressed hypothetical protein ; K13443 Niemann-Pick C2 protein	GO:0042445	biological_process	hormone metabolic process
csin107775	expressed hypothetical protein ; K13443 Niemann-Pick C2 protein	GO:0044237	biological_process	cellular metabolic process
csin107775	expressed hypothetical protein ; K13443 Niemann-Pick C2 protein	GO:0044238	biological_process	primary metabolic process
csin107775	expressed hypothetical protein ; K13443 Niemann-Pick C2 protein	GO:0044281	biological_process	small molecule metabolic process
csin107775	expressed hypothetical protein ; K13443 Niemann-Pick C2 protein	GO:0009987	biological_process	cellular process
csin107775	expressed hypothetical protein ; K13443 Niemann-Pick C2 protein	GO:0032501	biological_process	multicellular organismal process
csin107775	expressed hypothetical protein ; K13443 Niemann-Pick C2 protein	GO:0007275	biological_process	multicellular organismal development
csin107775	expressed hypothetical protein ; K13443 Niemann-Pick C2 protein	GO:0032502	biological_process	developmental process
csin107775	expressed hypothetical protein ; K13443 Niemann-Pick C2 protein	GO:0051179	biological_process	localization
csin107775	expressed hypothetical protein ; K13443 Niemann-Pick C2 protein	GO:0033036	biological_process	macromolecule localization
csin107775	expressed hypothetical protein ; K13443 Niemann-Pick C2 protein	GO:0051234	biological_process	establishment of localization
csin107775	expressed hypothetical protein ; K13443 Niemann-Pick C2 protein	GO:0065007	biological_process	biological regulation
csin107775	expressed hypothetical protein ; K13443 Niemann-Pick C2 protein	GO:0065008	biological_process	regulation of biological quality
csin107796	Transformer-2 protein homolog alpha	GO:0005488	molecular_function	binding
csin107796	Transformer-2 protein homolog alpha	GO:0000166	molecular_function	nucleotide binding
csin107796	Transformer-2 protein homolog alpha	GO:0003676	molecular_function	nucleic acid binding
csin107796	Transformer-2 protein homolog alpha	GO:0005515	molecular_function	protein binding
csin107796	Transformer-2 protein homolog alpha	GO:0008152	biological_process	metabolic process
csin107796	Transformer-2 protein homolog alpha	GO:0006807	biological_process	nitrogen compound metabolic process
csin107796	Transformer-2 protein homolog alpha	GO:0043170	biological_process	macromolecule metabolic process
csin107796	Transformer-2 protein homolog alpha	GO:0044237	biological_process	cellular metabolic process
csin107796	Transformer-2 protein homolog alpha	GO:0044238	biological_process	primary metabolic process
csin107796	Transformer-2 protein homolog alpha	GO:0009987	biological_process	cellular process
csin107970	Zinc finger protein 572	GO:0005488	molecular_function	binding
csin107970	Zinc finger protein 572	GO:0003676	molecular_function	nucleic acid binding
csin107970	Zinc finger protein 572	GO:0043167	molecular_function	ion binding
csin107970	Zinc finger protein 572	GO:0008152	biological_process	metabolic process
csin107970	Zinc finger protein 572	GO:0006807	biological_process	nitrogen compound metabolic process
csin107970	Zinc finger protein 572	GO:0009058	biological_process	biosynthetic process
csin107970	Zinc finger protein 572	GO:0043170	biological_process	macromolecule metabolic process
csin107970	Zinc finger protein 572	GO:0044237	biological_process	cellular metabolic process
csin107970	Zinc finger protein 572	GO:0044238	biological_process	primary metabolic process
csin107970	Zinc finger protein 572	GO:0019222	biological_process	regulation of metabolic process
csin107970	Zinc finger protein 572	GO:0009987	biological_process	cellular process
csin107970	Zinc finger protein 572	GO:0050794	biological_process	regulation of cellular process
csin107970	Zinc finger protein 572	GO:0065007	biological_process	biological regulation
csin107970	Zinc finger protein 572	GO:0050789	biological_process	regulation of biological process
csin107990	Hainantoxin-XI-12	GO:0005488	molecular_function	binding
csin107990	Hainantoxin-XI-12	GO:0043167	molecular_function	ion binding
csin107990	Hainantoxin-XI-12	GO:0030234	molecular_function	enzyme regulator activity
csin107990	Hainantoxin-XI-12	GO:0004857	molecular_function	enzyme inhibitor activity
csin107990	Hainantoxin-XI-12	GO:0061134	molecular_function	peptidase regulator activity
csin107990	Hainantoxin-XI-12	GO:0009987	biological_process	cellular process
csin107990	Hainantoxin-XI-12	GO:0071841	biological_process	cellular component organization or biogenesis at cellular level
csin107990	Hainantoxin-XI-12	GO:0050896	biological_process	response to stimulus
csin107990	Hainantoxin-XI-12	GO:0007610	biological_process	behavior
csin107990	Hainantoxin-XI-12	GO:0009605	biological_process	response to external stimulus
csin107990	Hainantoxin-XI-12	GO:0009628	biological_process	response to abiotic stimulus
csin107990	Hainantoxin-XI-12	GO:0071840	biological_process	cellular component organization or biogenesis
csin107990	Hainantoxin-XI-12	GO:0016043	biological_process	cellular component organization
csin107991	Protein AMBP	GO:0030234	molecular_function	enzyme regulator activity
csin107991	Protein AMBP	GO:0004857	molecular_function	enzyme inhibitor activity
csin107991	Protein AMBP	GO:0061134	molecular_function	peptidase regulator activity
csin108144	Acetylcholinesterase 1	GO:0003824	molecular_function	catalytic activity
csin108144	Acetylcholinesterase 1	GO:0016787	molecular_function	hydrolase activity
csin108144	Acetylcholinesterase 1	GO:0008152	biological_process	metabolic process
csin108144	Acetylcholinesterase 1	GO:0006807	biological_process	nitrogen compound metabolic process
csin108144	Acetylcholinesterase 1	GO:0009056	biological_process	catabolic process
csin108144	Acetylcholinesterase 1	GO:0044237	biological_process	cellular metabolic process
csin108144	Acetylcholinesterase 1	GO:0044281	biological_process	small molecule metabolic process
csin108144	Acetylcholinesterase 1	GO:0009987	biological_process	cellular process
csin108144	Acetylcholinesterase 1	GO:0007154	biological_process	cell communication
csin108144	Acetylcholinesterase 1	GO:0050794	biological_process	regulation of cellular process
csin108144	Acetylcholinesterase 1	GO:0023052	biological_process	signaling
csin108144	Acetylcholinesterase 1	GO:0035637	biological_process	multicellular organismal signaling
csin108144	Acetylcholinesterase 1	GO:0023051	biological_process	regulation of signaling
csin108144	Acetylcholinesterase 1	GO:0032501	biological_process	multicellular organismal process
csin108144	Acetylcholinesterase 1	GO:0003008	biological_process	system process
csin108144	Acetylcholinesterase 1	GO:0051239	biological_process	regulation of multicellular organismal process
csin108144	Acetylcholinesterase 1	GO:0065007	biological_process	biological regulation
csin108144	Acetylcholinesterase 1	GO:0050789	biological_process	regulation of biological process
csin108144	Acetylcholinesterase 1	GO:0065008	biological_process	regulation of biological quality
csin108177	ZNF324B, ZNF324; zinc finger protein 324B; K09228 KRAB domain-containing zin	GO:0005488	molecular_function	binding
csin108177	ZNF324B, ZNF324; zinc finger protein 324B; K09228 KRAB domain-containing zin	GO:0003676	molecular_function	nucleic acid binding
csin108177	ZNF324B, ZNF324; zinc finger protein 324B; K09228 KRAB domain-containing zin	GO:0043167	molecular_function	ion binding
csin108177	ZNF324B, ZNF324; zinc finger protein 324B; K09228 KRAB domain-containing zin	GO:0008152	biological_process	metabolic process
csin108177	ZNF324B, ZNF324; zinc finger protein 324B; K09228 KRAB domain-containing zin	GO:0006807	biological_process	nitrogen compound metabolic process
csin108177	ZNF324B, ZNF324; zinc finger protein 324B; K09228 KRAB domain-containing zin	GO:0009058	biological_process	biosynthetic process
csin108177	ZNF324B, ZNF324; zinc finger protein 324B; K09228 KRAB domain-containing zin	GO:0043170	biological_process	macromolecule metabolic process
csin108177	ZNF324B, ZNF324; zinc finger protein 324B; K09228 KRAB domain-containing zin	GO:0044237	biological_process	cellular metabolic process
csin108177	ZNF324B, ZNF324; zinc finger protein 324B; K09228 KRAB domain-containing zin	GO:0044238	biological_process	primary metabolic process
csin108177	ZNF324B, ZNF324; zinc finger protein 324B; K09228 KRAB domain-containing zin	GO:0019222	biological_process	regulation of metabolic process
csin108177	ZNF324B, ZNF324; zinc finger protein 324B; K09228 KRAB domain-containing zin	GO:0009987	biological_process	cellular process
csin108177	ZNF324B, ZNF324; zinc finger protein 324B; K09228 KRAB domain-containing zin	GO:0050794	biological_process	regulation of cellular process
csin108177	ZNF324B, ZNF324; zinc finger protein 324B; K09228 KRAB domain-containing zin	GO:0065007	biological_process	biological regulation
csin108177	ZNF324B, ZNF324; zinc finger protein 324B; K09228 KRAB domain-containing zin	GO:0050789	biological_process	regulation of biological process
csin108375	Protocadherin gamma-C4	GO:0005488	molecular_function	binding
csin108375	Protocadherin gamma-C4	GO:0043167	molecular_function	ion binding
csin108375	Protocadherin gamma-C4	GO:0060089	molecular_function	molecular transducer activity
csin108375	Protocadherin gamma-C4	GO:0004871	molecular_function	signal transducer activity
csin108375	Protocadherin gamma-C4	GO:0009987	biological_process	cellular process
csin108375	Protocadherin gamma-C4	GO:0007155	biological_process	cell adhesion
csin108375	Protocadherin gamma-C4	GO:0022610	biological_process	biological adhesion
csin108411	similar to AGAP011620-PA; K06236 collagen, type I/II/III/V/XI, alpha	GO:0005198	molecular_function	structural molecule activity
csin108411	similar to AGAP011620-PA; K06236 collagen, type I/II/III/V/XI, alpha	GO:0005201	molecular_function	extracellular matrix structural constituent
csin108411	similar to AGAP011620-PA; K06236 collagen, type I/II/III/V/XI, alpha	GO:0005488	molecular_function	binding
csin108411	similar to AGAP011620-PA; K06236 collagen, type I/II/III/V/XI, alpha	GO:0005515	molecular_function	protein binding
csin108411	similar to AGAP011620-PA; K06236 collagen, type I/II/III/V/XI, alpha	GO:0008152	biological_process	metabolic process
csin108411	similar to AGAP011620-PA; K06236 collagen, type I/II/III/V/XI, alpha	GO:0043170	biological_process	macromolecule metabolic process
csin108411	similar to AGAP011620-PA; K06236 collagen, type I/II/III/V/XI, alpha	GO:0044237	biological_process	cellular metabolic process
csin108411	similar to AGAP011620-PA; K06236 collagen, type I/II/III/V/XI, alpha	GO:0019222	biological_process	regulation of metabolic process
csin108411	similar to AGAP011620-PA; K06236 collagen, type I/II/III/V/XI, alpha	GO:0009987	biological_process	cellular process
csin108411	similar to AGAP011620-PA; K06236 collagen, type I/II/III/V/XI, alpha	GO:0007155	biological_process	cell adhesion
csin108411	similar to AGAP011620-PA; K06236 collagen, type I/II/III/V/XI, alpha	GO:0008219	biological_process	cell death
csin108411	similar to AGAP011620-PA; K06236 collagen, type I/II/III/V/XI, alpha	GO:0048869	biological_process	cellular developmental process
csin108411	similar to AGAP011620-PA; K06236 collagen, type I/II/III/V/XI, alpha	GO:0071841	biological_process	cellular component organization or biogenesis at cellular level
csin108411	similar to AGAP011620-PA; K06236 collagen, type I/II/III/V/XI, alpha	GO:0048523	biological_process	negative regulation of cellular process
csin108411	similar to AGAP011620-PA; K06236 collagen, type I/II/III/V/XI, alpha	GO:0050794	biological_process	regulation of cellular process
csin108411	similar to AGAP011620-PA; K06236 collagen, type I/II/III/V/XI, alpha	GO:0016265	biological_process	death
csin108411	similar to AGAP011620-PA; K06236 collagen, type I/II/III/V/XI, alpha	GO:0022610	biological_process	biological adhesion
csin108411	similar to AGAP011620-PA; K06236 collagen, type I/II/III/V/XI, alpha	GO:0032501	biological_process	multicellular organismal process
csin108411	similar to AGAP011620-PA; K06236 collagen, type I/II/III/V/XI, alpha	GO:0001503	biological_process	ossification
csin108411	similar to AGAP011620-PA; K06236 collagen, type I/II/III/V/XI, alpha	GO:0003008	biological_process	system process
csin108411	similar to AGAP011620-PA; K06236 collagen, type I/II/III/V/XI, alpha	GO:0007275	biological_process	multicellular organismal development
csin108411	similar to AGAP011620-PA; K06236 collagen, type I/II/III/V/XI, alpha	GO:0048871	biological_process	multicellular organismal homeostasis
csin108411	similar to AGAP011620-PA; K06236 collagen, type I/II/III/V/XI, alpha	GO:0032502	biological_process	developmental process
csin108411	similar to AGAP011620-PA; K06236 collagen, type I/II/III/V/XI, alpha	GO:0009653	biological_process	anatomical structure morphogenesis
csin108411	similar to AGAP011620-PA; K06236 collagen, type I/II/III/V/XI, alpha	GO:0048856	biological_process	anatomical structure development
csin108411	similar to AGAP011620-PA; K06236 collagen, type I/II/III/V/XI, alpha	GO:0040011	biological_process	locomotion
csin108411	similar to AGAP011620-PA; K06236 collagen, type I/II/III/V/XI, alpha	GO:0042330	biological_process	taxis
csin108411	similar to AGAP011620-PA; K06236 collagen, type I/II/III/V/XI, alpha	GO:0050896	biological_process	response to stimulus
csin108411	similar to AGAP011620-PA; K06236 collagen, type I/II/III/V/XI, alpha	GO:0009605	biological_process	response to external stimulus
csin108411	similar to AGAP011620-PA; K06236 collagen, type I/II/III/V/XI, alpha	GO:0042221	biological_process	response to chemical stimulus
csin108411	similar to AGAP011620-PA; K06236 collagen, type I/II/III/V/XI, alpha	GO:0065007	biological_process	biological regulation
csin108411	similar to AGAP011620-PA; K06236 collagen, type I/II/III/V/XI, alpha	GO:0050789	biological_process	regulation of biological process
csin108411	similar to AGAP011620-PA; K06236 collagen, type I/II/III/V/XI, alpha	GO:0065008	biological_process	regulation of biological quality
csin108411	similar to AGAP011620-PA; K06236 collagen, type I/II/III/V/XI, alpha	GO:0071840	biological_process	cellular component organization or biogenesis
csin108411	similar to AGAP011620-PA; K06236 collagen, type I/II/III/V/XI, alpha	GO:0016043	biological_process	cellular component organization
csin108563	neuroendocrine protein 7b2	GO:0030234	molecular_function	enzyme regulator activity
csin108563	neuroendocrine protein 7b2	GO:0008047	molecular_function	enzyme activator activity
csin108563	neuroendocrine protein 7b2	GO:0061134	molecular_function	peptidase regulator activity
csin108563	neuroendocrine protein 7b2	GO:0008152	biological_process	metabolic process
csin108563	neuroendocrine protein 7b2	GO:0042445	biological_process	hormone metabolic process
csin108563	neuroendocrine protein 7b2	GO:0043170	biological_process	macromolecule metabolic process
csin108563	neuroendocrine protein 7b2	GO:0044237	biological_process	cellular metabolic process
csin108563	neuroendocrine protein 7b2	GO:0044238	biological_process	primary metabolic process
csin108563	neuroendocrine protein 7b2	GO:0009893	biological_process	positive regulation of metabolic process
csin108563	neuroendocrine protein 7b2	GO:0019222	biological_process	regulation of metabolic process
csin108563	neuroendocrine protein 7b2	GO:0009987	biological_process	cellular process
csin108563	neuroendocrine protein 7b2	GO:0051716	biological_process	cellular response to stimulus
csin108563	neuroendocrine protein 7b2	GO:0048522	biological_process	positive regulation of cellular process
csin108563	neuroendocrine protein 7b2	GO:0050794	biological_process	regulation of cellular process
csin108563	neuroendocrine protein 7b2	GO:0023052	biological_process	signaling
csin108563	neuroendocrine protein 7b2	GO:0050896	biological_process	response to stimulus
csin108563	neuroendocrine protein 7b2	GO:0065007	biological_process	biological regulation
csin108563	neuroendocrine protein 7b2	GO:0050789	biological_process	regulation of biological process
csin108563	neuroendocrine protein 7b2	GO:0065008	biological_process	regulation of biological quality
csin108711	hypothetical protein	GO:0009987	biological_process	cellular process
csin108711	hypothetical protein	GO:0034330	biological_process	cell junction organization
csin108711	hypothetical protein	GO:0071841	biological_process	cellular component organization or biogenesis at cellular level
csin108711	hypothetical protein	GO:0032501	biological_process	multicellular organismal process
csin108711	hypothetical protein	GO:0007275	biological_process	multicellular organismal development
csin108711	hypothetical protein	GO:0032502	biological_process	developmental process
csin108711	hypothetical protein	GO:0048856	biological_process	anatomical structure development
csin108711	hypothetical protein	GO:0065007	biological_process	biological regulation
csin108711	hypothetical protein	GO:0065008	biological_process	regulation of biological quality
csin108711	hypothetical protein	GO:0071840	biological_process	cellular component organization or biogenesis
csin108711	hypothetical protein	GO:0016043	biological_process	cellular component organization
csin108711	hypothetical protein	GO:0044085	biological_process	cellular component biogenesis
csin108765	PDIA4, MGC137149; protein disulfide isomerase family A, member 4 (EC:5.3.4.1	GO:0003824	molecular_function	catalytic activity
csin108765	PDIA4, MGC137149; protein disulfide isomerase family A, member 4 (EC:5.3.4.1	GO:0016491	molecular_function	oxidoreductase activity
csin108765	PDIA4, MGC137149; protein disulfide isomerase family A, member 4 (EC:5.3.4.1	GO:0016853	molecular_function	isomerase activity
csin108765	PDIA4, MGC137149; protein disulfide isomerase family A, member 4 (EC:5.3.4.1	GO:0009055	molecular_function	electron carrier activity
csin108765	PDIA4, MGC137149; protein disulfide isomerase family A, member 4 (EC:5.3.4.1	GO:0008152	biological_process	metabolic process
csin108765	PDIA4, MGC137149; protein disulfide isomerase family A, member 4 (EC:5.3.4.1	GO:0044281	biological_process	small molecule metabolic process
csin108765	PDIA4, MGC137149; protein disulfide isomerase family A, member 4 (EC:5.3.4.1	GO:0009987	biological_process	cellular process
csin108765	PDIA4, MGC137149; protein disulfide isomerase family A, member 4 (EC:5.3.4.1	GO:0019725	biological_process	cellular homeostasis
csin108765	PDIA4, MGC137149; protein disulfide isomerase family A, member 4 (EC:5.3.4.1	GO:0050794	biological_process	regulation of cellular process
csin108765	PDIA4, MGC137149; protein disulfide isomerase family A, member 4 (EC:5.3.4.1	GO:0065007	biological_process	biological regulation
csin108765	PDIA4, MGC137149; protein disulfide isomerase family A, member 4 (EC:5.3.4.1	GO:0050789	biological_process	regulation of biological process
csin108765	PDIA4, MGC137149; protein disulfide isomerase family A, member 4 (EC:5.3.4.1	GO:0065008	biological_process	regulation of biological quality
csin108807	39S ribosomal protein L35, mitochondrial	GO:0005198	molecular_function	structural molecule activity
csin108807	39S ribosomal protein L35, mitochondrial	GO:0003735	molecular_function	structural constituent of ribosome
csin108807	39S ribosomal protein L35, mitochondrial	GO:0005488	molecular_function	binding
csin108807	39S ribosomal protein L35, mitochondrial	GO:0005515	molecular_function	protein binding
csin108807	39S ribosomal protein L35, mitochondrial	GO:0008152	biological_process	metabolic process
csin108807	39S ribosomal protein L35, mitochondrial	GO:0009058	biological_process	biosynthetic process
csin108807	39S ribosomal protein L35, mitochondrial	GO:0043170	biological_process	macromolecule metabolic process
csin108807	39S ribosomal protein L35, mitochondrial	GO:0044237	biological_process	cellular metabolic process
csin108807	39S ribosomal protein L35, mitochondrial	GO:0044238	biological_process	primary metabolic process
csin108807	39S ribosomal protein L35, mitochondrial	GO:0009987	biological_process	cellular process
csin108828	Collagen alpha-3(VI) chain	GO:0030234	molecular_function	enzyme regulator activity
csin108828	Collagen alpha-3(VI) chain	GO:0004857	molecular_function	enzyme inhibitor activity
csin108828	Collagen alpha-3(VI) chain	GO:0061134	molecular_function	peptidase regulator activity
csin108828	Collagen alpha-3(VI) chain	GO:0009987	biological_process	cellular process
csin108828	Collagen alpha-3(VI) chain	GO:0007155	biological_process	cell adhesion
csin108828	Collagen alpha-3(VI) chain	GO:0022610	biological_process	biological adhesion
csin108880	Lysyl oxidase homolog 2	GO:0003824	molecular_function	catalytic activity
csin108880	Lysyl oxidase homolog 2	GO:0016491	molecular_function	oxidoreductase activity
csin108880	Lysyl oxidase homolog 2	GO:0005488	molecular_function	binding
csin108880	Lysyl oxidase homolog 2	GO:0043167	molecular_function	ion binding
csin108880	Lysyl oxidase homolog 2	GO:0060089	molecular_function	molecular transducer activity
csin108880	Lysyl oxidase homolog 2	GO:0004871	molecular_function	signal transducer activity
csin108880	Lysyl oxidase homolog 2	GO:0008152	biological_process	metabolic process
csin108880	Lysyl oxidase homolog 2	GO:0043170	biological_process	macromolecule metabolic process
csin108880	Lysyl oxidase homolog 2	GO:0044237	biological_process	cellular metabolic process
csin108880	Lysyl oxidase homolog 2	GO:0044238	biological_process	primary metabolic process
csin108880	Lysyl oxidase homolog 2	GO:0055114	biological_process	oxidation-reduction process
csin108880	Lysyl oxidase homolog 2	GO:0009987	biological_process	cellular process
csin108880	Lysyl oxidase homolog 2	GO:0007155	biological_process	cell adhesion
csin108880	Lysyl oxidase homolog 2	GO:0022610	biological_process	biological adhesion
csin109034	TIP41-like protein	GO:0000003	biological_process	reproduction
csin109034	TIP41-like protein	GO:0032504	biological_process	multicellular organism reproduction
csin109034	TIP41-like protein	GO:0022414	biological_process	reproductive process
csin109034	TIP41-like protein	GO:0032501	biological_process	multicellular organismal process
csin109034	TIP41-like protein	GO:0040011	biological_process	locomotion
csin109034	TIP41-like protein	GO:0050896	biological_process	response to stimulus
csin109034	TIP41-like protein	GO:0007610	biological_process	behavior
csin109123	Protocadherin Fat 4	GO:0005488	molecular_function	binding
csin109123	Protocadherin Fat 4	GO:0043167	molecular_function	ion binding
csin109123	Protocadherin Fat 4	GO:0009987	biological_process	cellular process
csin109123	Protocadherin Fat 4	GO:0007155	biological_process	cell adhesion
csin109123	Protocadherin Fat 4	GO:0022610	biological_process	biological adhesion
csin109198	Ferritin, chloroplastic	GO:0003824	molecular_function	catalytic activity
csin109198	Ferritin, chloroplastic	GO:0016491	molecular_function	oxidoreductase activity
csin109198	Ferritin, chloroplastic	GO:0005488	molecular_function	binding
csin109198	Ferritin, chloroplastic	GO:0043167	molecular_function	ion binding
csin109198	Ferritin, chloroplastic	GO:0000003	biological_process	reproduction
csin109198	Ferritin, chloroplastic	GO:0022414	biological_process	reproductive process
csin109198	Ferritin, chloroplastic	GO:0008152	biological_process	metabolic process
csin109198	Ferritin, chloroplastic	GO:0044237	biological_process	cellular metabolic process
csin109198	Ferritin, chloroplastic	GO:0009987	biological_process	cellular process
csin109198	Ferritin, chloroplastic	GO:0019725	biological_process	cellular homeostasis
csin109198	Ferritin, chloroplastic	GO:0051716	biological_process	cellular response to stimulus
csin109198	Ferritin, chloroplastic	GO:0032501	biological_process	multicellular organismal process
csin109198	Ferritin, chloroplastic	GO:0007275	biological_process	multicellular organismal development
csin109198	Ferritin, chloroplastic	GO:0032502	biological_process	developmental process
csin109198	Ferritin, chloroplastic	GO:0048856	biological_process	anatomical structure development
csin109198	Ferritin, chloroplastic	GO:0050896	biological_process	response to stimulus
csin109198	Ferritin, chloroplastic	GO:0006950	biological_process	response to stress
csin109198	Ferritin, chloroplastic	GO:0009628	biological_process	response to abiotic stimulus
csin109198	Ferritin, chloroplastic	GO:0042221	biological_process	response to chemical stimulus
csin109198	Ferritin, chloroplastic	GO:0051179	biological_process	localization
csin109198	Ferritin, chloroplastic	GO:0051234	biological_process	establishment of localization
csin109198	Ferritin, chloroplastic	GO:0065007	biological_process	biological regulation
csin109198	Ferritin, chloroplastic	GO:0065008	biological_process	regulation of biological quality
csin109711	Probable cyclin-H	GO:0005488	molecular_function	binding
csin109711	Probable cyclin-H	GO:0005515	molecular_function	protein binding
csin109711	Probable cyclin-H	GO:0008152	biological_process	metabolic process
csin109711	Probable cyclin-H	GO:0006807	biological_process	nitrogen compound metabolic process
csin109711	Probable cyclin-H	GO:0009058	biological_process	biosynthetic process
csin109711	Probable cyclin-H	GO:0043170	biological_process	macromolecule metabolic process
csin109711	Probable cyclin-H	GO:0044237	biological_process	cellular metabolic process
csin109711	Probable cyclin-H	GO:0044238	biological_process	primary metabolic process
csin109711	Probable cyclin-H	GO:0019222	biological_process	regulation of metabolic process
csin109711	Probable cyclin-H	GO:0009987	biological_process	cellular process
csin109711	Probable cyclin-H	GO:0007049	biological_process	cell cycle
csin109711	Probable cyclin-H	GO:0050794	biological_process	regulation of cellular process
csin109711	Probable cyclin-H	GO:0065007	biological_process	biological regulation
csin109711	Probable cyclin-H	GO:0050789	biological_process	regulation of biological process
csin109711	Probable cyclin-H	GO:0065009	biological_process	regulation of molecular function
csin109945	Cathepsin L	GO:0003824	molecular_function	catalytic activity
csin109945	Cathepsin L	GO:0016787	molecular_function	hydrolase activity
csin109945	Cathepsin L	GO:0008152	biological_process	metabolic process
csin109945	Cathepsin L	GO:0043170	biological_process	macromolecule metabolic process
csin109945	Cathepsin L	GO:0044238	biological_process	primary metabolic process
csin109991	Procollagen C-endopeptidase enhancer 2	GO:0005488	molecular_function	binding
csin109991	Procollagen C-endopeptidase enhancer 2	GO:0001871	molecular_function	pattern binding
csin109991	Procollagen C-endopeptidase enhancer 2	GO:0005515	molecular_function	protein binding
csin109991	Procollagen C-endopeptidase enhancer 2	GO:0030246	molecular_function	carbohydrate binding
csin109991	Procollagen C-endopeptidase enhancer 2	GO:0030234	molecular_function	enzyme regulator activity
csin109991	Procollagen C-endopeptidase enhancer 2	GO:0008047	molecular_function	enzyme activator activity
csin109991	Procollagen C-endopeptidase enhancer 2	GO:0061134	molecular_function	peptidase regulator activity
csin109991	Procollagen C-endopeptidase enhancer 2	GO:0008152	biological_process	metabolic process
csin109991	Procollagen C-endopeptidase enhancer 2	GO:0019222	biological_process	regulation of metabolic process
csin109991	Procollagen C-endopeptidase enhancer 2	GO:0065007	biological_process	biological regulation
csin109991	Procollagen C-endopeptidase enhancer 2	GO:0050789	biological_process	regulation of biological process
csin109991	Procollagen C-endopeptidase enhancer 2	GO:0065009	biological_process	regulation of molecular function
csin110333	cysteinyl-tRNA synthetase ; K01883 cysteinyl-tRNA synthetase [EC:6.1.1.16]	GO:0003824	molecular_function	catalytic activity
csin110333	cysteinyl-tRNA synthetase ; K01883 cysteinyl-tRNA synthetase [EC:6.1.1.16]	GO:0016874	molecular_function	ligase activity
csin110333	cysteinyl-tRNA synthetase ; K01883 cysteinyl-tRNA synthetase [EC:6.1.1.16]	GO:0005488	molecular_function	binding
csin110333	cysteinyl-tRNA synthetase ; K01883 cysteinyl-tRNA synthetase [EC:6.1.1.16]	GO:0000166	molecular_function	nucleotide binding
csin110333	cysteinyl-tRNA synthetase ; K01883 cysteinyl-tRNA synthetase [EC:6.1.1.16]	GO:0003676	molecular_function	nucleic acid binding
csin110333	cysteinyl-tRNA synthetase ; K01883 cysteinyl-tRNA synthetase [EC:6.1.1.16]	GO:0005515	molecular_function	protein binding
csin110333	cysteinyl-tRNA synthetase ; K01883 cysteinyl-tRNA synthetase [EC:6.1.1.16]	GO:0008152	biological_process	metabolic process
csin110333	cysteinyl-tRNA synthetase ; K01883 cysteinyl-tRNA synthetase [EC:6.1.1.16]	GO:0006807	biological_process	nitrogen compound metabolic process
csin110333	cysteinyl-tRNA synthetase ; K01883 cysteinyl-tRNA synthetase [EC:6.1.1.16]	GO:0009058	biological_process	biosynthetic process
csin110333	cysteinyl-tRNA synthetase ; K01883 cysteinyl-tRNA synthetase [EC:6.1.1.16]	GO:0043170	biological_process	macromolecule metabolic process
csin110333	cysteinyl-tRNA synthetase ; K01883 cysteinyl-tRNA synthetase [EC:6.1.1.16]	GO:0044237	biological_process	cellular metabolic process
csin110333	cysteinyl-tRNA synthetase ; K01883 cysteinyl-tRNA synthetase [EC:6.1.1.16]	GO:0044238	biological_process	primary metabolic process
csin110333	cysteinyl-tRNA synthetase ; K01883 cysteinyl-tRNA synthetase [EC:6.1.1.16]	GO:0044281	biological_process	small molecule metabolic process
csin110333	cysteinyl-tRNA synthetase ; K01883 cysteinyl-tRNA synthetase [EC:6.1.1.16]	GO:0009987	biological_process	cellular process
csin110460	replication protein A ; K10739 replication factor A2	GO:0008152	biological_process	metabolic process
csin110460	replication protein A ; K10739 replication factor A2	GO:0006807	biological_process	nitrogen compound metabolic process
csin110460	replication protein A ; K10739 replication factor A2	GO:0009058	biological_process	biosynthetic process
csin110460	replication protein A ; K10739 replication factor A2	GO:0043170	biological_process	macromolecule metabolic process
csin110460	replication protein A ; K10739 replication factor A2	GO:0044237	biological_process	cellular metabolic process
csin110460	replication protein A ; K10739 replication factor A2	GO:0044238	biological_process	primary metabolic process
csin110460	replication protein A ; K10739 replication factor A2	GO:0019222	biological_process	regulation of metabolic process
csin110460	replication protein A ; K10739 replication factor A2	GO:0009987	biological_process	cellular process
csin110460	replication protein A ; K10739 replication factor A2	GO:0051716	biological_process	cellular response to stimulus
csin110460	replication protein A ; K10739 replication factor A2	GO:0050794	biological_process	regulation of cellular process
csin110460	replication protein A ; K10739 replication factor A2	GO:0050896	biological_process	response to stimulus
csin110460	replication protein A ; K10739 replication factor A2	GO:0006950	biological_process	response to stress
csin110460	replication protein A ; K10739 replication factor A2	GO:0048583	biological_process	regulation of response to stimulus
csin110460	replication protein A ; K10739 replication factor A2	GO:0065007	biological_process	biological regulation
csin110460	replication protein A ; K10739 replication factor A2	GO:0050789	biological_process	regulation of biological process
csin110513	Thrombospondin-2	GO:0005198	molecular_function	structural molecule activity
csin110513	Thrombospondin-2	GO:0005488	molecular_function	binding
csin110513	Thrombospondin-2	GO:0001871	molecular_function	pattern binding
csin110513	Thrombospondin-2	GO:0005515	molecular_function	protein binding
csin110513	Thrombospondin-2	GO:0030246	molecular_function	carbohydrate binding
csin110513	Thrombospondin-2	GO:0043167	molecular_function	ion binding
csin110513	Thrombospondin-2	GO:0009987	biological_process	cellular process
csin110513	Thrombospondin-2	GO:0007155	biological_process	cell adhesion
csin110513	Thrombospondin-2	GO:0022610	biological_process	biological adhesion
csin110516	hypothetical protein; K00253 isovaleryl-CoA dehydrogenase [EC:1.3.99.10]	GO:0003824	molecular_function	catalytic activity
csin110516	hypothetical protein; K00253 isovaleryl-CoA dehydrogenase [EC:1.3.99.10]	GO:0016491	molecular_function	oxidoreductase activity
csin110516	hypothetical protein; K00253 isovaleryl-CoA dehydrogenase [EC:1.3.99.10]	GO:0005488	molecular_function	binding
csin110516	hypothetical protein; K00253 isovaleryl-CoA dehydrogenase [EC:1.3.99.10]	GO:0048037	molecular_function	cofactor binding
csin110516	hypothetical protein; K00253 isovaleryl-CoA dehydrogenase [EC:1.3.99.10]	GO:0008152	biological_process	metabolic process
csin110516	hypothetical protein; K00253 isovaleryl-CoA dehydrogenase [EC:1.3.99.10]	GO:0009056	biological_process	catabolic process
csin110516	hypothetical protein; K00253 isovaleryl-CoA dehydrogenase [EC:1.3.99.10]	GO:0044237	biological_process	cellular metabolic process
csin110516	hypothetical protein; K00253 isovaleryl-CoA dehydrogenase [EC:1.3.99.10]	GO:0044238	biological_process	primary metabolic process
csin110516	hypothetical protein; K00253 isovaleryl-CoA dehydrogenase [EC:1.3.99.10]	GO:0044281	biological_process	small molecule metabolic process
csin110516	hypothetical protein; K00253 isovaleryl-CoA dehydrogenase [EC:1.3.99.10]	GO:0009987	biological_process	cellular process
csin110536	Blastula protease 10	GO:0003824	molecular_function	catalytic activity
csin110536	Blastula protease 10	GO:0016787	molecular_function	hydrolase activity
csin110536	Blastula protease 10	GO:0005488	molecular_function	binding
csin110536	Blastula protease 10	GO:0043167	molecular_function	ion binding
csin110536	Blastula protease 10	GO:0008152	biological_process	metabolic process
csin110536	Blastula protease 10	GO:0043170	biological_process	macromolecule metabolic process
csin110536	Blastula protease 10	GO:0044238	biological_process	primary metabolic process
csin110568	Endoglycoceramidase	GO:0003824	molecular_function	catalytic activity
csin110568	Endoglycoceramidase	GO:0016787	molecular_function	hydrolase activity
csin110568	Endoglycoceramidase	GO:0005488	molecular_function	binding
csin110568	Endoglycoceramidase	GO:0043167	molecular_function	ion binding
csin110568	Endoglycoceramidase	GO:0008152	biological_process	metabolic process
csin110568	Endoglycoceramidase	GO:0044238	biological_process	primary metabolic process
csin110587	Cubn, AA408369, AL022750, D2Wsu88e; cubilin (intrinsic factor-cobalamin rece	GO:0005488	molecular_function	binding
csin110587	Cubn, AA408369, AL022750, D2Wsu88e; cubilin (intrinsic factor-cobalamin rece	GO:0043167	molecular_function	ion binding
csin110757	60S ribosomal protein L26 ; K02898 large subunit ribosomal protein L26e	GO:0005198	molecular_function	structural molecule activity
csin110757	60S ribosomal protein L26 ; K02898 large subunit ribosomal protein L26e	GO:0003735	molecular_function	structural constituent of ribosome
csin110757	60S ribosomal protein L26 ; K02898 large subunit ribosomal protein L26e	GO:0005488	molecular_function	binding
csin110757	60S ribosomal protein L26 ; K02898 large subunit ribosomal protein L26e	GO:0003676	molecular_function	nucleic acid binding
csin110757	60S ribosomal protein L26 ; K02898 large subunit ribosomal protein L26e	GO:0005515	molecular_function	protein binding
csin110757	60S ribosomal protein L26 ; K02898 large subunit ribosomal protein L26e	GO:0000003	biological_process	reproduction
csin110757	60S ribosomal protein L26 ; K02898 large subunit ribosomal protein L26e	GO:0022414	biological_process	reproductive process
csin110757	60S ribosomal protein L26 ; K02898 large subunit ribosomal protein L26e	GO:0008152	biological_process	metabolic process
csin110757	60S ribosomal protein L26 ; K02898 large subunit ribosomal protein L26e	GO:0006807	biological_process	nitrogen compound metabolic process
csin110757	60S ribosomal protein L26 ; K02898 large subunit ribosomal protein L26e	GO:0009058	biological_process	biosynthetic process
csin110757	60S ribosomal protein L26 ; K02898 large subunit ribosomal protein L26e	GO:0043170	biological_process	macromolecule metabolic process
csin110757	60S ribosomal protein L26 ; K02898 large subunit ribosomal protein L26e	GO:0044237	biological_process	cellular metabolic process
csin110757	60S ribosomal protein L26 ; K02898 large subunit ribosomal protein L26e	GO:0044238	biological_process	primary metabolic process
csin110757	60S ribosomal protein L26 ; K02898 large subunit ribosomal protein L26e	GO:0009987	biological_process	cellular process
csin110757	60S ribosomal protein L26 ; K02898 large subunit ribosomal protein L26e	GO:0071841	biological_process	cellular component organization or biogenesis at cellular level
csin110757	60S ribosomal protein L26 ; K02898 large subunit ribosomal protein L26e	GO:0016032	biological_process	viral reproduction
csin110757	60S ribosomal protein L26 ; K02898 large subunit ribosomal protein L26e	GO:0032501	biological_process	multicellular organismal process
csin110757	60S ribosomal protein L26 ; K02898 large subunit ribosomal protein L26e	GO:0007275	biological_process	multicellular organismal development
csin110757	60S ribosomal protein L26 ; K02898 large subunit ribosomal protein L26e	GO:0032502	biological_process	developmental process
csin110757	60S ribosomal protein L26 ; K02898 large subunit ribosomal protein L26e	GO:0048856	biological_process	anatomical structure development
csin110757	60S ribosomal protein L26 ; K02898 large subunit ribosomal protein L26e	GO:0071840	biological_process	cellular component organization or biogenesis
csin110757	60S ribosomal protein L26 ; K02898 large subunit ribosomal protein L26e	GO:0016043	biological_process	cellular component organization
csin110757	60S ribosomal protein L26 ; K02898 large subunit ribosomal protein L26e	GO:0044085	biological_process	cellular component biogenesis
csin110805	dj-1 protein (park7) ; K05687 protein DJ-1	GO:0032501	biological_process	multicellular organismal process
csin110805	dj-1 protein (park7) ; K05687 protein DJ-1	GO:0030534	biological_process	adult behavior
csin110805	dj-1 protein (park7) ; K05687 protein DJ-1	GO:0050896	biological_process	response to stimulus
csin110805	dj-1 protein (park7) ; K05687 protein DJ-1	GO:0006950	biological_process	response to stress
csin110805	dj-1 protein (park7) ; K05687 protein DJ-1	GO:0007610	biological_process	behavior
csin110805	dj-1 protein (park7) ; K05687 protein DJ-1	GO:0042221	biological_process	response to chemical stimulus
csin110816	Thioredoxin peroxidase	GO:0003824	molecular_function	catalytic activity
csin110816	Thioredoxin peroxidase	GO:0016491	molecular_function	oxidoreductase activity
csin110816	Thioredoxin peroxidase	GO:0005488	molecular_function	binding
csin110816	Thioredoxin peroxidase	GO:0005515	molecular_function	protein binding
csin110816	Thioredoxin peroxidase	GO:0016209	molecular_function	antioxidant activity
csin110816	Thioredoxin peroxidase	GO:0008152	biological_process	metabolic process
csin110816	Thioredoxin peroxidase	GO:0009056	biological_process	catabolic process
csin110816	Thioredoxin peroxidase	GO:0044237	biological_process	cellular metabolic process
csin110816	Thioredoxin peroxidase	GO:0009987	biological_process	cellular process
csin110816	Thioredoxin peroxidase	GO:0019725	biological_process	cellular homeostasis
csin110816	Thioredoxin peroxidase	GO:0051716	biological_process	cellular response to stimulus
csin110816	Thioredoxin peroxidase	GO:0050794	biological_process	regulation of cellular process
csin110816	Thioredoxin peroxidase	GO:0050896	biological_process	response to stimulus
csin110816	Thioredoxin peroxidase	GO:0006950	biological_process	response to stress
csin110816	Thioredoxin peroxidase	GO:0042221	biological_process	response to chemical stimulus
csin110816	Thioredoxin peroxidase	GO:0065007	biological_process	biological regulation
csin110816	Thioredoxin peroxidase	GO:0050789	biological_process	regulation of biological process
csin110816	Thioredoxin peroxidase	GO:0065008	biological_process	regulation of biological quality
csin110826	Matrix metalloproteinase-25	GO:0003824	molecular_function	catalytic activity
csin110826	Matrix metalloproteinase-25	GO:0016787	molecular_function	hydrolase activity
csin110826	Matrix metalloproteinase-25	GO:0005488	molecular_function	binding
csin110826	Matrix metalloproteinase-25	GO:0043167	molecular_function	ion binding
csin110826	Matrix metalloproteinase-25	GO:0008152	biological_process	metabolic process
csin110826	Matrix metalloproteinase-25	GO:0043170	biological_process	macromolecule metabolic process
csin110826	Matrix metalloproteinase-25	GO:0044238	biological_process	primary metabolic process
csin110826	Matrix metalloproteinase-25	GO:0050896	biological_process	response to stimulus
csin110826	Matrix metalloproteinase-25	GO:0006950	biological_process	response to stress
csin110907	rRNA methyltransferase 1, mitochondrial	GO:0003824	molecular_function	catalytic activity
csin110907	rRNA methyltransferase 1, mitochondrial	GO:0016740	molecular_function	transferase activity
csin110907	rRNA methyltransferase 1, mitochondrial	GO:0005488	molecular_function	binding
csin110907	rRNA methyltransferase 1, mitochondrial	GO:0003676	molecular_function	nucleic acid binding
csin110907	rRNA methyltransferase 1, mitochondrial	GO:0008152	biological_process	metabolic process
csin110907	rRNA methyltransferase 1, mitochondrial	GO:0006807	biological_process	nitrogen compound metabolic process
csin110907	rRNA methyltransferase 1, mitochondrial	GO:0043170	biological_process	macromolecule metabolic process
csin110907	rRNA methyltransferase 1, mitochondrial	GO:0044237	biological_process	cellular metabolic process
csin110907	rRNA methyltransferase 1, mitochondrial	GO:0044238	biological_process	primary metabolic process
csin110907	rRNA methyltransferase 1, mitochondrial	GO:0009987	biological_process	cellular process
csin110952	inositol polyphosphate multikinase ; K00328 inositol-polyphosphate multikina	GO:0003824	molecular_function	catalytic activity
csin110952	inositol polyphosphate multikinase ; K00328 inositol-polyphosphate multikina	GO:0016740	molecular_function	transferase activity
csin110952	inositol polyphosphate multikinase ; K00328 inositol-polyphosphate multikina	GO:0008152	biological_process	metabolic process
csin110952	inositol polyphosphate multikinase ; K00328 inositol-polyphosphate multikina	GO:0044237	biological_process	cellular metabolic process
csin110952	inositol polyphosphate multikinase ; K00328 inositol-polyphosphate multikina	GO:0044238	biological_process	primary metabolic process
csin110952	inositol polyphosphate multikinase ; K00328 inositol-polyphosphate multikina	GO:0044281	biological_process	small molecule metabolic process
csin110952	inositol polyphosphate multikinase ; K00328 inositol-polyphosphate multikina	GO:0009987	biological_process	cellular process
csin110952	inositol polyphosphate multikinase ; K00328 inositol-polyphosphate multikina	GO:0032501	biological_process	multicellular organismal process
csin110952	inositol polyphosphate multikinase ; K00328 inositol-polyphosphate multikina	GO:0007275	biological_process	multicellular organismal development
csin110952	inositol polyphosphate multikinase ; K00328 inositol-polyphosphate multikina	GO:0032502	biological_process	developmental process
csin110952	inositol polyphosphate multikinase ; K00328 inositol-polyphosphate multikina	GO:0009653	biological_process	anatomical structure morphogenesis
csin110952	inositol polyphosphate multikinase ; K00328 inositol-polyphosphate multikina	GO:0048856	biological_process	anatomical structure development
csin111084	hypothetical protein ; K13443 Niemann-Pick C2 protein	GO:0005488	molecular_function	binding
csin111084	hypothetical protein ; K13443 Niemann-Pick C2 protein	GO:0005515	molecular_function	protein binding
csin111084	hypothetical protein ; K13443 Niemann-Pick C2 protein	GO:0008289	molecular_function	lipid binding
csin111084	hypothetical protein ; K13443 Niemann-Pick C2 protein	GO:0009987	biological_process	cellular process
csin111084	hypothetical protein ; K13443 Niemann-Pick C2 protein	GO:0051641	biological_process	cellular localization
csin111084	hypothetical protein ; K13443 Niemann-Pick C2 protein	GO:0050896	biological_process	response to stimulus
csin111084	hypothetical protein ; K13443 Niemann-Pick C2 protein	GO:0009607	biological_process	response to biotic stimulus
csin111084	hypothetical protein ; K13443 Niemann-Pick C2 protein	GO:0051179	biological_process	localization
csin111084	hypothetical protein ; K13443 Niemann-Pick C2 protein	GO:0033036	biological_process	macromolecule localization
csin111084	hypothetical protein ; K13443 Niemann-Pick C2 protein	GO:0051234	biological_process	establishment of localization
csin111084	hypothetical protein ; K13443 Niemann-Pick C2 protein	GO:0051704	biological_process	multi-organism process
csin111084	hypothetical protein ; K13443 Niemann-Pick C2 protein	GO:0065007	biological_process	biological regulation
csin111084	hypothetical protein ; K13443 Niemann-Pick C2 protein	GO:0065008	biological_process	regulation of biological quality
csin111099	Ras association domain-containing protein 1	GO:0005488	molecular_function	binding
csin111099	Ras association domain-containing protein 1	GO:0005515	molecular_function	protein binding
csin111099	Ras association domain-containing protein 1	GO:0008152	biological_process	metabolic process
csin111099	Ras association domain-containing protein 1	GO:0043170	biological_process	macromolecule metabolic process
csin111099	Ras association domain-containing protein 1	GO:0044237	biological_process	cellular metabolic process
csin111099	Ras association domain-containing protein 1	GO:0044238	biological_process	primary metabolic process
csin111099	Ras association domain-containing protein 1	GO:0009893	biological_process	positive regulation of metabolic process
csin111099	Ras association domain-containing protein 1	GO:0019222	biological_process	regulation of metabolic process
csin111099	Ras association domain-containing protein 1	GO:0009987	biological_process	cellular process
csin111099	Ras association domain-containing protein 1	GO:0007049	biological_process	cell cycle
csin111099	Ras association domain-containing protein 1	GO:0051716	biological_process	cellular response to stimulus
csin111099	Ras association domain-containing protein 1	GO:0048522	biological_process	positive regulation of cellular process
csin111099	Ras association domain-containing protein 1	GO:0048523	biological_process	negative regulation of cellular process
csin111099	Ras association domain-containing protein 1	GO:0050794	biological_process	regulation of cellular process
csin111099	Ras association domain-containing protein 1	GO:0023052	biological_process	signaling
csin111099	Ras association domain-containing protein 1	GO:0050896	biological_process	response to stimulus
csin111099	Ras association domain-containing protein 1	GO:0006950	biological_process	response to stress
csin111099	Ras association domain-containing protein 1	GO:0065007	biological_process	biological regulation
csin111099	Ras association domain-containing protein 1	GO:0050789	biological_process	regulation of biological process
csin111099	Ras association domain-containing protein 1	GO:0065008	biological_process	regulation of biological quality
csin111111	Transmembrane and TPR repeat-containing protein 3	GO:0005488	molecular_function	binding
csin111163	Stromal cell-derived factor 2	GO:0003824	molecular_function	catalytic activity
csin111163	Stromal cell-derived factor 2	GO:0016740	molecular_function	transferase activity
csin111163	Stromal cell-derived factor 2	GO:0008152	biological_process	metabolic process
csin111163	Stromal cell-derived factor 2	GO:0009058	biological_process	biosynthetic process
csin111163	Stromal cell-derived factor 2	GO:0043170	biological_process	macromolecule metabolic process
csin111163	Stromal cell-derived factor 2	GO:0044237	biological_process	cellular metabolic process
csin111163	Stromal cell-derived factor 2	GO:0044238	biological_process	primary metabolic process
csin111163	Stromal cell-derived factor 2	GO:0009987	biological_process	cellular process
csin111233	uncharacterized protein K02A2.6-like	GO:0005488	molecular_function	binding
csin111233	uncharacterized protein K02A2.6-like	GO:0043167	molecular_function	ion binding
csin111319	hypothetical protein	GO:0032501	biological_process	multicellular organismal process
csin111319	hypothetical protein	GO:0007275	biological_process	multicellular organismal development
csin111319	hypothetical protein	GO:0032502	biological_process	developmental process
csin111319	hypothetical protein	GO:0009653	biological_process	anatomical structure morphogenesis
csin111319	hypothetical protein	GO:0048856	biological_process	anatomical structure development
csin111319	hypothetical protein	GO:0040007	biological_process	growth
csin111319	hypothetical protein	GO:0040008	biological_process	regulation of growth
csin111319	hypothetical protein	GO:0065007	biological_process	biological regulation
csin111319	hypothetical protein	GO:0050789	biological_process	regulation of biological process
csin111482	Scavenger receptor cysteine-rich domain-containing group B protein	GO:0060089	molecular_function	molecular transducer activity
csin111482	Scavenger receptor cysteine-rich domain-containing group B protein	GO:0004871	molecular_function	signal transducer activity
csin111638	Lactadherin	GO:0005488	molecular_function	binding
csin111638	Lactadherin	GO:0005515	molecular_function	protein binding
csin111638	Lactadherin	GO:0008289	molecular_function	lipid binding
csin111638	Lactadherin	GO:0000003	biological_process	reproduction
csin111638	Lactadherin	GO:0019953	biological_process	sexual reproduction
csin111638	Lactadherin	GO:0022414	biological_process	reproductive process
csin111638	Lactadherin	GO:0008283	biological_process	cell proliferation
csin111638	Lactadherin	GO:0008284	biological_process	positive regulation of cell proliferation
csin111638	Lactadherin	GO:0042127	biological_process	regulation of cell proliferation
csin111638	Lactadherin	GO:0009987	biological_process	cellular process
csin111638	Lactadherin	GO:0007155	biological_process	cell adhesion
csin111638	Lactadherin	GO:0008037	biological_process	cell recognition
csin111638	Lactadherin	GO:0016044	biological_process	cellular membrane organization
csin111638	Lactadherin	GO:0016192	biological_process	vesicle-mediated transport
csin111638	Lactadherin	GO:0048522	biological_process	positive regulation of cellular process
csin111638	Lactadherin	GO:0050794	biological_process	regulation of cellular process
csin111638	Lactadherin	GO:0022610	biological_process	biological adhesion
csin111638	Lactadherin	GO:0032501	biological_process	multicellular organismal process
csin111638	Lactadherin	GO:0007275	biological_process	multicellular organismal development
csin111638	Lactadherin	GO:0032502	biological_process	developmental process
csin111638	Lactadherin	GO:0009653	biological_process	anatomical structure morphogenesis
csin111638	Lactadherin	GO:0048856	biological_process	anatomical structure development
csin111638	Lactadherin	GO:0050896	biological_process	response to stimulus
csin111638	Lactadherin	GO:0009719	biological_process	response to endogenous stimulus
csin111638	Lactadherin	GO:0042221	biological_process	response to chemical stimulus
csin111638	Lactadherin	GO:0051179	biological_process	localization
csin111638	Lactadherin	GO:0032879	biological_process	regulation of localization
csin111638	Lactadherin	GO:0051234	biological_process	establishment of localization
csin111638	Lactadherin	GO:0065007	biological_process	biological regulation
csin111638	Lactadherin	GO:0050789	biological_process	regulation of biological process
csin111638	Lactadherin	GO:0071840	biological_process	cellular component organization or biogenesis
csin111638	Lactadherin	GO:0016043	biological_process	cellular component organization
csin111705	Probable tRNA pseudouridine synthase 2	GO:0003824	molecular_function	catalytic activity
csin111705	Probable tRNA pseudouridine synthase 2	GO:0016853	molecular_function	isomerase activity
csin111705	Probable tRNA pseudouridine synthase 2	GO:0005488	molecular_function	binding
csin111705	Probable tRNA pseudouridine synthase 2	GO:0003676	molecular_function	nucleic acid binding
csin111705	Probable tRNA pseudouridine synthase 2	GO:0008152	biological_process	metabolic process
csin111705	Probable tRNA pseudouridine synthase 2	GO:0006807	biological_process	nitrogen compound metabolic process
csin111705	Probable tRNA pseudouridine synthase 2	GO:0043170	biological_process	macromolecule metabolic process
csin111705	Probable tRNA pseudouridine synthase 2	GO:0044237	biological_process	cellular metabolic process
csin111705	Probable tRNA pseudouridine synthase 2	GO:0044238	biological_process	primary metabolic process
csin111705	Probable tRNA pseudouridine synthase 2	GO:0009987	biological_process	cellular process
csin111731	cathepsin D (A01 family) ; K01379 cathepsin D [EC:3.4.23.5]	GO:0003824	molecular_function	catalytic activity
csin111731	cathepsin D (A01 family) ; K01379 cathepsin D [EC:3.4.23.5]	GO:0016787	molecular_function	hydrolase activity
csin111731	cathepsin D (A01 family) ; K01379 cathepsin D [EC:3.4.23.5]	GO:0000003	biological_process	reproduction
csin111731	cathepsin D (A01 family) ; K01379 cathepsin D [EC:3.4.23.5]	GO:0019953	biological_process	sexual reproduction
csin111731	cathepsin D (A01 family) ; K01379 cathepsin D [EC:3.4.23.5]	GO:0032504	biological_process	multicellular organism reproduction
csin111731	cathepsin D (A01 family) ; K01379 cathepsin D [EC:3.4.23.5]	GO:0022414	biological_process	reproductive process
csin111731	cathepsin D (A01 family) ; K01379 cathepsin D [EC:3.4.23.5]	GO:0008152	biological_process	metabolic process
csin111731	cathepsin D (A01 family) ; K01379 cathepsin D [EC:3.4.23.5]	GO:0043170	biological_process	macromolecule metabolic process
csin111731	cathepsin D (A01 family) ; K01379 cathepsin D [EC:3.4.23.5]	GO:0044238	biological_process	primary metabolic process
csin111731	cathepsin D (A01 family) ; K01379 cathepsin D [EC:3.4.23.5]	GO:0009987	biological_process	cellular process
csin111731	cathepsin D (A01 family) ; K01379 cathepsin D [EC:3.4.23.5]	GO:0008219	biological_process	cell death
csin111731	cathepsin D (A01 family) ; K01379 cathepsin D [EC:3.4.23.5]	GO:0016265	biological_process	death
csin111731	cathepsin D (A01 family) ; K01379 cathepsin D [EC:3.4.23.5]	GO:0016271	biological_process	tissue death
csin111731	cathepsin D (A01 family) ; K01379 cathepsin D [EC:3.4.23.5]	GO:0032501	biological_process	multicellular organismal process
csin111731	cathepsin D (A01 family) ; K01379 cathepsin D [EC:3.4.23.5]	GO:0007275	biological_process	multicellular organismal development
csin111731	cathepsin D (A01 family) ; K01379 cathepsin D [EC:3.4.23.5]	GO:0032502	biological_process	developmental process
csin111731	cathepsin D (A01 family) ; K01379 cathepsin D [EC:3.4.23.5]	GO:0009653	biological_process	anatomical structure morphogenesis
csin111731	cathepsin D (A01 family) ; K01379 cathepsin D [EC:3.4.23.5]	GO:0048856	biological_process	anatomical structure development
csin111859	hypothetical protein	GO:0005198	molecular_function	structural molecule activity
csin111859	hypothetical protein	GO:0003735	molecular_function	structural constituent of ribosome
csin111859	hypothetical protein	GO:0008152	biological_process	metabolic process
csin111859	hypothetical protein	GO:0009058	biological_process	biosynthetic process
csin111859	hypothetical protein	GO:0043170	biological_process	macromolecule metabolic process
csin111859	hypothetical protein	GO:0044237	biological_process	cellular metabolic process
csin111859	hypothetical protein	GO:0044238	biological_process	primary metabolic process
csin111859	hypothetical protein	GO:0009987	biological_process	cellular process
csin112112	mitochondrial translational initiation factor ; K02519 translation initiatio	GO:0003824	molecular_function	catalytic activity
csin112112	mitochondrial translational initiation factor ; K02519 translation initiatio	GO:0016787	molecular_function	hydrolase activity
csin112112	mitochondrial translational initiation factor ; K02519 translation initiatio	GO:0005488	molecular_function	binding
csin112112	mitochondrial translational initiation factor ; K02519 translation initiatio	GO:0000166	molecular_function	nucleotide binding
csin112112	mitochondrial translational initiation factor ; K02519 translation initiatio	GO:0003676	molecular_function	nucleic acid binding
csin112112	mitochondrial translational initiation factor ; K02519 translation initiatio	GO:0008152	biological_process	metabolic process
csin112112	mitochondrial translational initiation factor ; K02519 translation initiatio	GO:0009058	biological_process	biosynthetic process
csin112112	mitochondrial translational initiation factor ; K02519 translation initiatio	GO:0043170	biological_process	macromolecule metabolic process
csin112112	mitochondrial translational initiation factor ; K02519 translation initiatio	GO:0044237	biological_process	cellular metabolic process
csin112112	mitochondrial translational initiation factor ; K02519 translation initiatio	GO:0044238	biological_process	primary metabolic process
csin112112	mitochondrial translational initiation factor ; K02519 translation initiatio	GO:0009987	biological_process	cellular process
csin112151	MECOM, AML1-EVI-1, EVI1, MDS1, MDS1-EVI1, MGC163392, MGC97004, PRDM3; MDS1 a	GO:0001071	molecular_function	nucleic acid binding transcription factor activity
csin112151	MECOM, AML1-EVI-1, EVI1, MDS1, MDS1-EVI1, MGC163392, MGC97004, PRDM3; MDS1 a	GO:0003700	molecular_function	sequence-specific DNA binding transcription factor activity
csin112151	MECOM, AML1-EVI-1, EVI1, MDS1, MDS1-EVI1, MGC163392, MGC97004, PRDM3; MDS1 a	GO:0005488	molecular_function	binding
csin112151	MECOM, AML1-EVI-1, EVI1, MDS1, MDS1-EVI1, MGC163392, MGC97004, PRDM3; MDS1 a	GO:0003676	molecular_function	nucleic acid binding
csin112151	MECOM, AML1-EVI-1, EVI1, MDS1, MDS1-EVI1, MGC163392, MGC97004, PRDM3; MDS1 a	GO:0005515	molecular_function	protein binding
csin112151	MECOM, AML1-EVI-1, EVI1, MDS1, MDS1-EVI1, MGC163392, MGC97004, PRDM3; MDS1 a	GO:0043167	molecular_function	ion binding
csin112151	MECOM, AML1-EVI-1, EVI1, MDS1, MDS1-EVI1, MGC163392, MGC97004, PRDM3; MDS1 a	GO:0002376	biological_process	immune system process
csin112151	MECOM, AML1-EVI-1, EVI1, MDS1, MDS1-EVI1, MGC163392, MGC97004, PRDM3; MDS1 a	GO:0002262	biological_process	myeloid cell homeostasis
csin112151	MECOM, AML1-EVI-1, EVI1, MDS1, MDS1-EVI1, MGC163392, MGC97004, PRDM3; MDS1 a	GO:0002520	biological_process	immune system development
csin112151	MECOM, AML1-EVI-1, EVI1, MDS1, MDS1-EVI1, MGC163392, MGC97004, PRDM3; MDS1 a	GO:0008152	biological_process	metabolic process
csin112151	MECOM, AML1-EVI-1, EVI1, MDS1, MDS1-EVI1, MGC163392, MGC97004, PRDM3; MDS1 a	GO:0006807	biological_process	nitrogen compound metabolic process
csin112151	MECOM, AML1-EVI-1, EVI1, MDS1, MDS1-EVI1, MGC163392, MGC97004, PRDM3; MDS1 a	GO:0009058	biological_process	biosynthetic process
csin112151	MECOM, AML1-EVI-1, EVI1, MDS1, MDS1-EVI1, MGC163392, MGC97004, PRDM3; MDS1 a	GO:0043170	biological_process	macromolecule metabolic process
csin112151	MECOM, AML1-EVI-1, EVI1, MDS1, MDS1-EVI1, MGC163392, MGC97004, PRDM3; MDS1 a	GO:0044237	biological_process	cellular metabolic process
csin112151	MECOM, AML1-EVI-1, EVI1, MDS1, MDS1-EVI1, MGC163392, MGC97004, PRDM3; MDS1 a	GO:0044238	biological_process	primary metabolic process
csin112151	MECOM, AML1-EVI-1, EVI1, MDS1, MDS1-EVI1, MGC163392, MGC97004, PRDM3; MDS1 a	GO:0009892	biological_process	negative regulation of metabolic process
csin112151	MECOM, AML1-EVI-1, EVI1, MDS1, MDS1-EVI1, MGC163392, MGC97004, PRDM3; MDS1 a	GO:0009893	biological_process	positive regulation of metabolic process
csin112151	MECOM, AML1-EVI-1, EVI1, MDS1, MDS1-EVI1, MGC163392, MGC97004, PRDM3; MDS1 a	GO:0019222	biological_process	regulation of metabolic process
csin112151	MECOM, AML1-EVI-1, EVI1, MDS1, MDS1-EVI1, MGC163392, MGC97004, PRDM3; MDS1 a	GO:0008283	biological_process	cell proliferation
csin112151	MECOM, AML1-EVI-1, EVI1, MDS1, MDS1-EVI1, MGC163392, MGC97004, PRDM3; MDS1 a	GO:0042127	biological_process	regulation of cell proliferation
csin112151	MECOM, AML1-EVI-1, EVI1, MDS1, MDS1-EVI1, MGC163392, MGC97004, PRDM3; MDS1 a	GO:0009987	biological_process	cellular process
csin112151	MECOM, AML1-EVI-1, EVI1, MDS1, MDS1-EVI1, MGC163392, MGC97004, PRDM3; MDS1 a	GO:0007049	biological_process	cell cycle
csin112151	MECOM, AML1-EVI-1, EVI1, MDS1, MDS1-EVI1, MGC163392, MGC97004, PRDM3; MDS1 a	GO:0007154	biological_process	cell communication
csin112151	MECOM, AML1-EVI-1, EVI1, MDS1, MDS1-EVI1, MGC163392, MGC97004, PRDM3; MDS1 a	GO:0008219	biological_process	cell death
csin112151	MECOM, AML1-EVI-1, EVI1, MDS1, MDS1-EVI1, MGC163392, MGC97004, PRDM3; MDS1 a	GO:0048869	biological_process	cellular developmental process
csin112151	MECOM, AML1-EVI-1, EVI1, MDS1, MDS1-EVI1, MGC163392, MGC97004, PRDM3; MDS1 a	GO:0051716	biological_process	cellular response to stimulus
csin112151	MECOM, AML1-EVI-1, EVI1, MDS1, MDS1-EVI1, MGC163392, MGC97004, PRDM3; MDS1 a	GO:0048522	biological_process	positive regulation of cellular process
csin112151	MECOM, AML1-EVI-1, EVI1, MDS1, MDS1-EVI1, MGC163392, MGC97004, PRDM3; MDS1 a	GO:0048523	biological_process	negative regulation of cellular process
csin112151	MECOM, AML1-EVI-1, EVI1, MDS1, MDS1-EVI1, MGC163392, MGC97004, PRDM3; MDS1 a	GO:0050794	biological_process	regulation of cellular process
csin112151	MECOM, AML1-EVI-1, EVI1, MDS1, MDS1-EVI1, MGC163392, MGC97004, PRDM3; MDS1 a	GO:0016265	biological_process	death
csin112151	MECOM, AML1-EVI-1, EVI1, MDS1, MDS1-EVI1, MGC163392, MGC97004, PRDM3; MDS1 a	GO:0023052	biological_process	signaling
csin112151	MECOM, AML1-EVI-1, EVI1, MDS1, MDS1-EVI1, MGC163392, MGC97004, PRDM3; MDS1 a	GO:0023051	biological_process	regulation of signaling
csin112151	MECOM, AML1-EVI-1, EVI1, MDS1, MDS1-EVI1, MGC163392, MGC97004, PRDM3; MDS1 a	GO:0032501	biological_process	multicellular organismal process
csin112151	MECOM, AML1-EVI-1, EVI1, MDS1, MDS1-EVI1, MGC163392, MGC97004, PRDM3; MDS1 a	GO:0007275	biological_process	multicellular organismal development
csin112151	MECOM, AML1-EVI-1, EVI1, MDS1, MDS1-EVI1, MGC163392, MGC97004, PRDM3; MDS1 a	GO:0032502	biological_process	developmental process
csin112151	MECOM, AML1-EVI-1, EVI1, MDS1, MDS1-EVI1, MGC163392, MGC97004, PRDM3; MDS1 a	GO:0009653	biological_process	anatomical structure morphogenesis
csin112151	MECOM, AML1-EVI-1, EVI1, MDS1, MDS1-EVI1, MGC163392, MGC97004, PRDM3; MDS1 a	GO:0048856	biological_process	anatomical structure development
csin112151	MECOM, AML1-EVI-1, EVI1, MDS1, MDS1-EVI1, MGC163392, MGC97004, PRDM3; MDS1 a	GO:0050896	biological_process	response to stimulus
csin112151	MECOM, AML1-EVI-1, EVI1, MDS1, MDS1-EVI1, MGC163392, MGC97004, PRDM3; MDS1 a	GO:0006950	biological_process	response to stress
csin112151	MECOM, AML1-EVI-1, EVI1, MDS1, MDS1-EVI1, MGC163392, MGC97004, PRDM3; MDS1 a	GO:0009605	biological_process	response to external stimulus
csin112151	MECOM, AML1-EVI-1, EVI1, MDS1, MDS1-EVI1, MGC163392, MGC97004, PRDM3; MDS1 a	GO:0009607	biological_process	response to biotic stimulus
csin112151	MECOM, AML1-EVI-1, EVI1, MDS1, MDS1-EVI1, MGC163392, MGC97004, PRDM3; MDS1 a	GO:0048583	biological_process	regulation of response to stimulus
csin112151	MECOM, AML1-EVI-1, EVI1, MDS1, MDS1-EVI1, MGC163392, MGC97004, PRDM3; MDS1 a	GO:0051704	biological_process	multi-organism process
csin112151	MECOM, AML1-EVI-1, EVI1, MDS1, MDS1-EVI1, MGC163392, MGC97004, PRDM3; MDS1 a	GO:0065007	biological_process	biological regulation
csin112151	MECOM, AML1-EVI-1, EVI1, MDS1, MDS1-EVI1, MGC163392, MGC97004, PRDM3; MDS1 a	GO:0050789	biological_process	regulation of biological process
csin112151	MECOM, AML1-EVI-1, EVI1, MDS1, MDS1-EVI1, MGC163392, MGC97004, PRDM3; MDS1 a	GO:0065008	biological_process	regulation of biological quality
csin112282	Cathepsin L	GO:0003824	molecular_function	catalytic activity
csin112282	Cathepsin L	GO:0016787	molecular_function	hydrolase activity
csin112282	Cathepsin L	GO:0005488	molecular_function	binding
csin112282	Cathepsin L	GO:0005515	molecular_function	protein binding
csin112282	Cathepsin L	GO:0008152	biological_process	metabolic process
csin112282	Cathepsin L	GO:0009056	biological_process	catabolic process
csin112282	Cathepsin L	GO:0043170	biological_process	macromolecule metabolic process
csin112282	Cathepsin L	GO:0044238	biological_process	primary metabolic process
csin112282	Cathepsin L	GO:0009987	biological_process	cellular process
csin112282	Cathepsin L	GO:0008219	biological_process	cell death
csin112282	Cathepsin L	GO:0016265	biological_process	death
csin112282	Cathepsin L	GO:0016271	biological_process	tissue death
csin112282	Cathepsin L	GO:0032501	biological_process	multicellular organismal process
csin112282	Cathepsin L	GO:0007275	biological_process	multicellular organismal development
csin112282	Cathepsin L	GO:0007586	biological_process	digestion
csin112282	Cathepsin L	GO:0032502	biological_process	developmental process
csin112282	Cathepsin L	GO:0009653	biological_process	anatomical structure morphogenesis
csin112282	Cathepsin L	GO:0048856	biological_process	anatomical structure development
csin112304	Cathepsin L	GO:0003824	molecular_function	catalytic activity
csin112304	Cathepsin L	GO:0016787	molecular_function	hydrolase activity
csin112304	Cathepsin L	GO:0005488	molecular_function	binding
csin112304	Cathepsin L	GO:0005515	molecular_function	protein binding
csin112304	Cathepsin L	GO:0008152	biological_process	metabolic process
csin112304	Cathepsin L	GO:0009056	biological_process	catabolic process
csin112304	Cathepsin L	GO:0043170	biological_process	macromolecule metabolic process
csin112304	Cathepsin L	GO:0044238	biological_process	primary metabolic process
csin112304	Cathepsin L	GO:0009987	biological_process	cellular process
csin112304	Cathepsin L	GO:0008219	biological_process	cell death
csin112304	Cathepsin L	GO:0016265	biological_process	death
csin112304	Cathepsin L	GO:0016271	biological_process	tissue death
csin112304	Cathepsin L	GO:0032501	biological_process	multicellular organismal process
csin112304	Cathepsin L	GO:0007275	biological_process	multicellular organismal development
csin112304	Cathepsin L	GO:0007586	biological_process	digestion
csin112304	Cathepsin L	GO:0032502	biological_process	developmental process
csin112304	Cathepsin L	GO:0009653	biological_process	anatomical structure morphogenesis
csin112304	Cathepsin L	GO:0048856	biological_process	anatomical structure development
csin112357	Plasminogen	GO:0003824	molecular_function	catalytic activity
csin112357	Plasminogen	GO:0016787	molecular_function	hydrolase activity
csin112357	Plasminogen	GO:0008152	biological_process	metabolic process
csin112357	Plasminogen	GO:0009056	biological_process	catabolic process
csin112357	Plasminogen	GO:0043170	biological_process	macromolecule metabolic process
csin112357	Plasminogen	GO:0044237	biological_process	cellular metabolic process
csin112357	Plasminogen	GO:0044238	biological_process	primary metabolic process
csin112357	Plasminogen	GO:0009987	biological_process	cellular process
csin112484	hypothetical protein ; K13443 Niemann-Pick C2 protein	GO:0005488	molecular_function	binding
csin112484	hypothetical protein ; K13443 Niemann-Pick C2 protein	GO:0005515	molecular_function	protein binding
csin112484	hypothetical protein ; K13443 Niemann-Pick C2 protein	GO:0008289	molecular_function	lipid binding
csin112484	hypothetical protein ; K13443 Niemann-Pick C2 protein	GO:0009987	biological_process	cellular process
csin112484	hypothetical protein ; K13443 Niemann-Pick C2 protein	GO:0051641	biological_process	cellular localization
csin112484	hypothetical protein ; K13443 Niemann-Pick C2 protein	GO:0050896	biological_process	response to stimulus
csin112484	hypothetical protein ; K13443 Niemann-Pick C2 protein	GO:0009607	biological_process	response to biotic stimulus
csin112484	hypothetical protein ; K13443 Niemann-Pick C2 protein	GO:0051179	biological_process	localization
csin112484	hypothetical protein ; K13443 Niemann-Pick C2 protein	GO:0033036	biological_process	macromolecule localization
csin112484	hypothetical protein ; K13443 Niemann-Pick C2 protein	GO:0051234	biological_process	establishment of localization
csin112484	hypothetical protein ; K13443 Niemann-Pick C2 protein	GO:0051704	biological_process	multi-organism process
csin112484	hypothetical protein ; K13443 Niemann-Pick C2 protein	GO:0065007	biological_process	biological regulation
csin112484	hypothetical protein ; K13443 Niemann-Pick C2 protein	GO:0065008	biological_process	regulation of biological quality
csin112508	anion exchange protein ; K13862 solute carrier family 4 (sodium borate trans	GO:0005215	molecular_function	transporter activity
csin112508	anion exchange protein ; K13862 solute carrier family 4 (sodium borate trans	GO:0022857	molecular_function	transmembrane transporter activity
csin112508	anion exchange protein ; K13862 solute carrier family 4 (sodium borate trans	GO:0022892	molecular_function	substrate-specific transporter activity
csin112508	anion exchange protein ; K13862 solute carrier family 4 (sodium borate trans	GO:0051179	biological_process	localization
csin112508	anion exchange protein ; K13862 solute carrier family 4 (sodium borate trans	GO:0051234	biological_process	establishment of localization
csin112642	Venom trypsin inhibitor	GO:0030234	molecular_function	enzyme regulator activity
csin112642	Venom trypsin inhibitor	GO:0004857	molecular_function	enzyme inhibitor activity
csin112642	Venom trypsin inhibitor	GO:0061134	molecular_function	peptidase regulator activity
csin112642	Venom trypsin inhibitor	GO:0008152	biological_process	metabolic process
csin112642	Venom trypsin inhibitor	GO:0043170	biological_process	macromolecule metabolic process
csin112642	Venom trypsin inhibitor	GO:0044238	biological_process	primary metabolic process
csin112642	Venom trypsin inhibitor	GO:0019222	biological_process	regulation of metabolic process
csin112642	Venom trypsin inhibitor	GO:0032501	biological_process	multicellular organismal process
csin112642	Venom trypsin inhibitor	GO:0050817	biological_process	coagulation
csin112642	Venom trypsin inhibitor	GO:0050878	biological_process	regulation of body fluid levels
csin112642	Venom trypsin inhibitor	GO:0050896	biological_process	response to stimulus
csin112642	Venom trypsin inhibitor	GO:0006950	biological_process	response to stress
csin112642	Venom trypsin inhibitor	GO:0065007	biological_process	biological regulation
csin112642	Venom trypsin inhibitor	GO:0050789	biological_process	regulation of biological process
csin112642	Venom trypsin inhibitor	GO:0065008	biological_process	regulation of biological quality
csin112642	Venom trypsin inhibitor	GO:0065009	biological_process	regulation of molecular function
csin112707	similar to expressed hypothetical protein; K13443 Niemann-Pick C2 protein	GO:0005488	molecular_function	binding
csin112707	similar to expressed hypothetical protein; K13443 Niemann-Pick C2 protein	GO:0005515	molecular_function	protein binding
csin112707	similar to expressed hypothetical protein; K13443 Niemann-Pick C2 protein	GO:0008289	molecular_function	lipid binding
csin112707	similar to expressed hypothetical protein; K13443 Niemann-Pick C2 protein	GO:0009987	biological_process	cellular process
csin112707	similar to expressed hypothetical protein; K13443 Niemann-Pick C2 protein	GO:0051641	biological_process	cellular localization
csin112707	similar to expressed hypothetical protein; K13443 Niemann-Pick C2 protein	GO:0050896	biological_process	response to stimulus
csin112707	similar to expressed hypothetical protein; K13443 Niemann-Pick C2 protein	GO:0009607	biological_process	response to biotic stimulus
csin112707	similar to expressed hypothetical protein; K13443 Niemann-Pick C2 protein	GO:0051179	biological_process	localization
csin112707	similar to expressed hypothetical protein; K13443 Niemann-Pick C2 protein	GO:0033036	biological_process	macromolecule localization
csin112707	similar to expressed hypothetical protein; K13443 Niemann-Pick C2 protein	GO:0051234	biological_process	establishment of localization
csin112707	similar to expressed hypothetical protein; K13443 Niemann-Pick C2 protein	GO:0051704	biological_process	multi-organism process
csin112707	similar to expressed hypothetical protein; K13443 Niemann-Pick C2 protein	GO:0065007	biological_process	biological regulation
csin112707	similar to expressed hypothetical protein; K13443 Niemann-Pick C2 protein	GO:0065008	biological_process	regulation of biological quality
csin113184	Prohibitin	GO:0005488	molecular_function	binding
csin113184	Prohibitin	GO:0003676	molecular_function	nucleic acid binding
csin113184	Prohibitin	GO:0005515	molecular_function	protein binding
csin113184	Prohibitin	GO:0000003	biological_process	reproduction
csin113184	Prohibitin	GO:0032504	biological_process	multicellular organism reproduction
csin113184	Prohibitin	GO:0022414	biological_process	reproductive process
csin113184	Prohibitin	GO:0008152	biological_process	metabolic process
csin113184	Prohibitin	GO:0006807	biological_process	nitrogen compound metabolic process
csin113184	Prohibitin	GO:0009058	biological_process	biosynthetic process
csin113184	Prohibitin	GO:0043170	biological_process	macromolecule metabolic process
csin113184	Prohibitin	GO:0044237	biological_process	cellular metabolic process
csin113184	Prohibitin	GO:0044238	biological_process	primary metabolic process
csin113184	Prohibitin	GO:0009892	biological_process	negative regulation of metabolic process
csin113184	Prohibitin	GO:0009893	biological_process	positive regulation of metabolic process
csin113184	Prohibitin	GO:0019222	biological_process	regulation of metabolic process
csin113184	Prohibitin	GO:0008283	biological_process	cell proliferation
csin113184	Prohibitin	GO:0008285	biological_process	negative regulation of cell proliferation
csin113184	Prohibitin	GO:0042127	biological_process	regulation of cell proliferation
csin113184	Prohibitin	GO:0009987	biological_process	cellular process
csin113184	Prohibitin	GO:0007154	biological_process	cell communication
csin113184	Prohibitin	GO:0008219	biological_process	cell death
csin113184	Prohibitin	GO:0016049	biological_process	cell growth
csin113184	Prohibitin	GO:0051716	biological_process	cellular response to stimulus
csin113184	Prohibitin	GO:0071841	biological_process	cellular component organization or biogenesis at cellular level
csin113184	Prohibitin	GO:0048522	biological_process	positive regulation of cellular process
csin113184	Prohibitin	GO:0048523	biological_process	negative regulation of cellular process
csin113184	Prohibitin	GO:0050794	biological_process	regulation of cellular process
csin113184	Prohibitin	GO:0016265	biological_process	death
csin113184	Prohibitin	GO:0023052	biological_process	signaling
csin113184	Prohibitin	GO:0023051	biological_process	regulation of signaling
csin113184	Prohibitin	GO:0032501	biological_process	multicellular organismal process
csin113184	Prohibitin	GO:0007275	biological_process	multicellular organismal development
csin113184	Prohibitin	GO:0032502	biological_process	developmental process
csin113184	Prohibitin	GO:0009653	biological_process	anatomical structure morphogenesis
csin113184	Prohibitin	GO:0048856	biological_process	anatomical structure development
csin113184	Prohibitin	GO:0040007	biological_process	growth
csin113184	Prohibitin	GO:0040008	biological_process	regulation of growth
csin113184	Prohibitin	GO:0048511	biological_process	rhythmic process
csin113184	Prohibitin	GO:0050896	biological_process	response to stimulus
csin113184	Prohibitin	GO:0006950	biological_process	response to stress
csin113184	Prohibitin	GO:0009719	biological_process	response to endogenous stimulus
csin113184	Prohibitin	GO:0042221	biological_process	response to chemical stimulus
csin113184	Prohibitin	GO:0048583	biological_process	regulation of response to stimulus
csin113184	Prohibitin	GO:0065007	biological_process	biological regulation
csin113184	Prohibitin	GO:0050789	biological_process	regulation of biological process
csin113184	Prohibitin	GO:0065008	biological_process	regulation of biological quality
csin113184	Prohibitin	GO:0071840	biological_process	cellular component organization or biogenesis
csin113184	Prohibitin	GO:0016043	biological_process	cellular component organization
csin113273	Cathepsin L	GO:0003824	molecular_function	catalytic activity
csin113273	Cathepsin L	GO:0016787	molecular_function	hydrolase activity
csin113602	dld, MGC158216, sc:d0402; deltaD; K06051 delta	GO:0005488	molecular_function	binding
csin113602	dld, MGC158216, sc:d0402; deltaD; K06051 delta	GO:0005515	molecular_function	protein binding
csin113602	dld, MGC158216, sc:d0402; deltaD; K06051 delta	GO:0043167	molecular_function	ion binding
csin113602	dld, MGC158216, sc:d0402; deltaD; K06051 delta	GO:0009987	biological_process	cellular process
csin113602	dld, MGC158216, sc:d0402; deltaD; K06051 delta	GO:0007154	biological_process	cell communication
csin113602	dld, MGC158216, sc:d0402; deltaD; K06051 delta	GO:0048869	biological_process	cellular developmental process
csin113602	dld, MGC158216, sc:d0402; deltaD; K06051 delta	GO:0051716	biological_process	cellular response to stimulus
csin113602	dld, MGC158216, sc:d0402; deltaD; K06051 delta	GO:0071841	biological_process	cellular component organization or biogenesis at cellular level
csin113602	dld, MGC158216, sc:d0402; deltaD; K06051 delta	GO:0050794	biological_process	regulation of cellular process
csin113602	dld, MGC158216, sc:d0402; deltaD; K06051 delta	GO:0023052	biological_process	signaling
csin113602	dld, MGC158216, sc:d0402; deltaD; K06051 delta	GO:0032501	biological_process	multicellular organismal process
csin113602	dld, MGC158216, sc:d0402; deltaD; K06051 delta	GO:0007275	biological_process	multicellular organismal development
csin113602	dld, MGC158216, sc:d0402; deltaD; K06051 delta	GO:0032502	biological_process	developmental process
csin113602	dld, MGC158216, sc:d0402; deltaD; K06051 delta	GO:0009653	biological_process	anatomical structure morphogenesis
csin113602	dld, MGC158216, sc:d0402; deltaD; K06051 delta	GO:0048856	biological_process	anatomical structure development
csin113602	dld, MGC158216, sc:d0402; deltaD; K06051 delta	GO:0050896	biological_process	response to stimulus
csin113602	dld, MGC158216, sc:d0402; deltaD; K06051 delta	GO:0065007	biological_process	biological regulation
csin113602	dld, MGC158216, sc:d0402; deltaD; K06051 delta	GO:0050789	biological_process	regulation of biological process
csin113602	dld, MGC158216, sc:d0402; deltaD; K06051 delta	GO:0071840	biological_process	cellular component organization or biogenesis
csin113602	dld, MGC158216, sc:d0402; deltaD; K06051 delta	GO:0016043	biological_process	cellular component organization
csin113602	dld, MGC158216, sc:d0402; deltaD; K06051 delta	GO:0044085	biological_process	cellular component biogenesis
